# Supplementary material for: Mononuclear nickel(ii) complexes as electrocatalysts in hydrogen evolution reactions: effects of alkyl side chain lengths
Source: Royal Society of Chemistry journal article supplement (doi:10.1039/d2ma00462c), 2022-01-01
Supplement: d2ma00462c1.pdf [file d2ma00462c1.pdf]

## **Mononuclear nickel(II) complexes as electrocatalyst in hydrogen evolution reactions: Effect of alkyl side chain length**

**Arpita Barma,<sup>†</sup> Malay Chakraborty,<sup>†</sup> Swapan Kumar Bhattacharya,<sup>\*,†</sup> Pritam Ghosh<sup>\*,‡</sup>  
and Partha Roy<sup>\*,†</sup>**

<sup>†</sup>Department of Chemistry, Jadavpur University, Kolkata 700 032, India

E-mail: partha.roy@jadavpuruniversity.in (P.R.)

skbhatt7@yahoo.co.in (S.K.B.)

<sup>‡</sup> Department Institut für Chemie, Humboldt-Universität zu Berlin, Brook-Taylor-Straße 2,  
12489 Berlin, Germany

E-mail: ppitamghosh@gmail.com (P.G.)

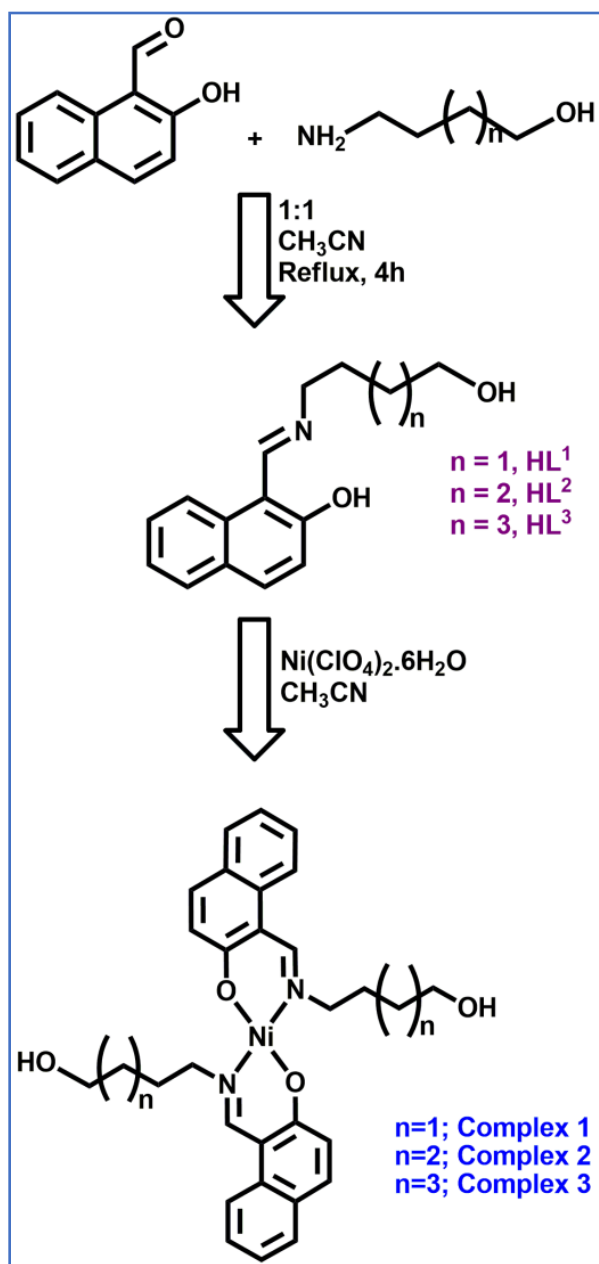

**Scheme S1:** Synthetic route to Complexes 1, 2 and 3.

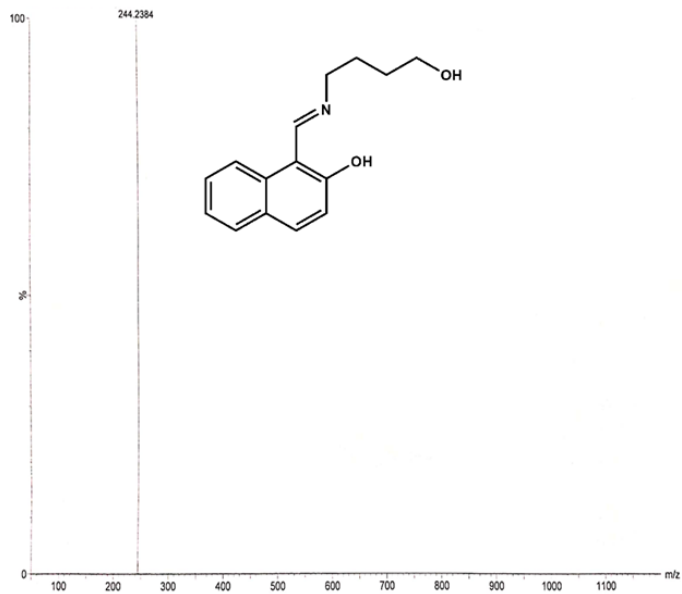

**Fig. S1** Mass spectrum of HL<sup>1</sup> in methanol.

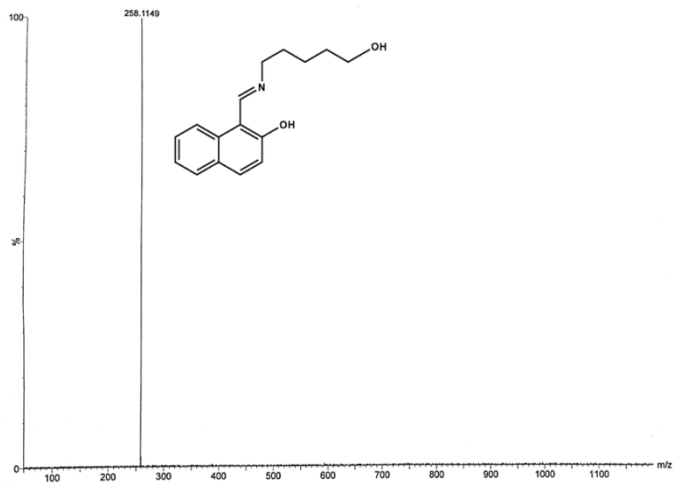

**Fig. S2** Mass spectrum of HL<sup>2</sup> in methanol.

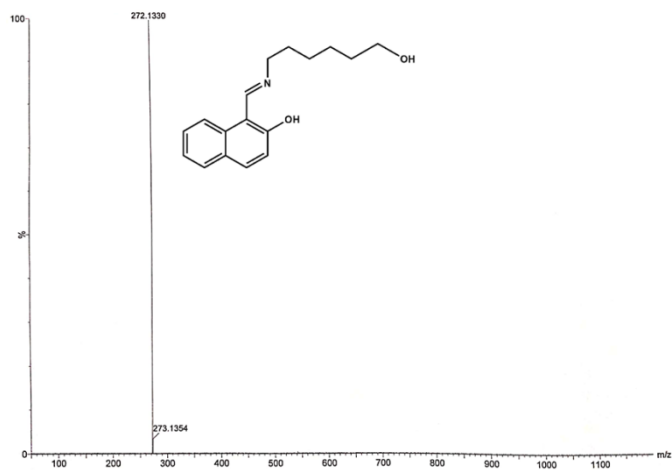

Fig. S3 Mass spectrum of HL<sup>3</sup> in methanol.

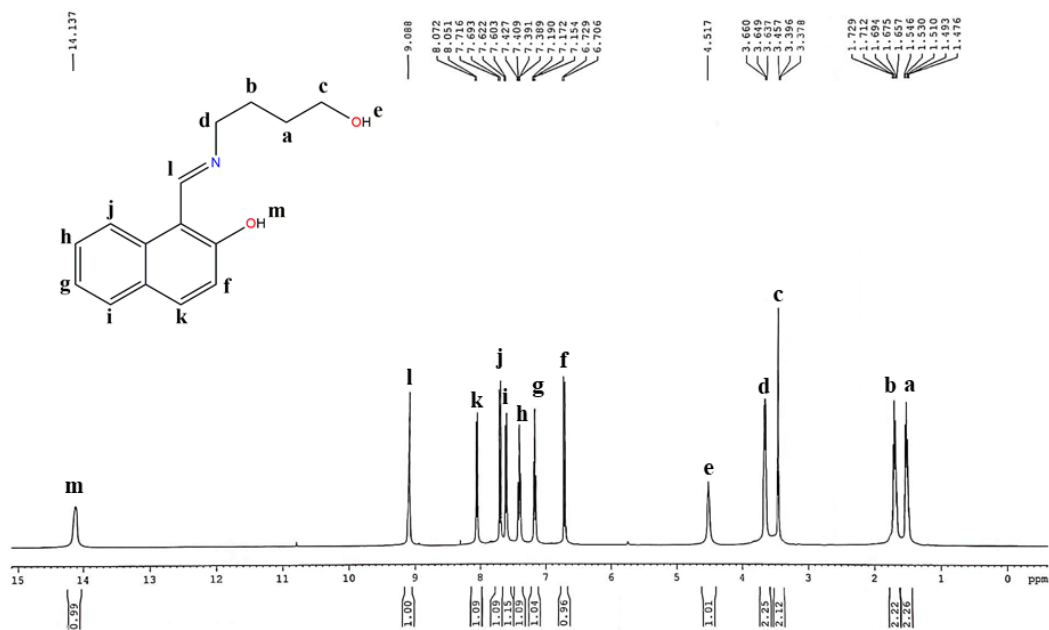

Fig. S4 <sup>1</sup>H NMR spectrum of HL<sup>1</sup> in DMSO-d<sub>6</sub>.

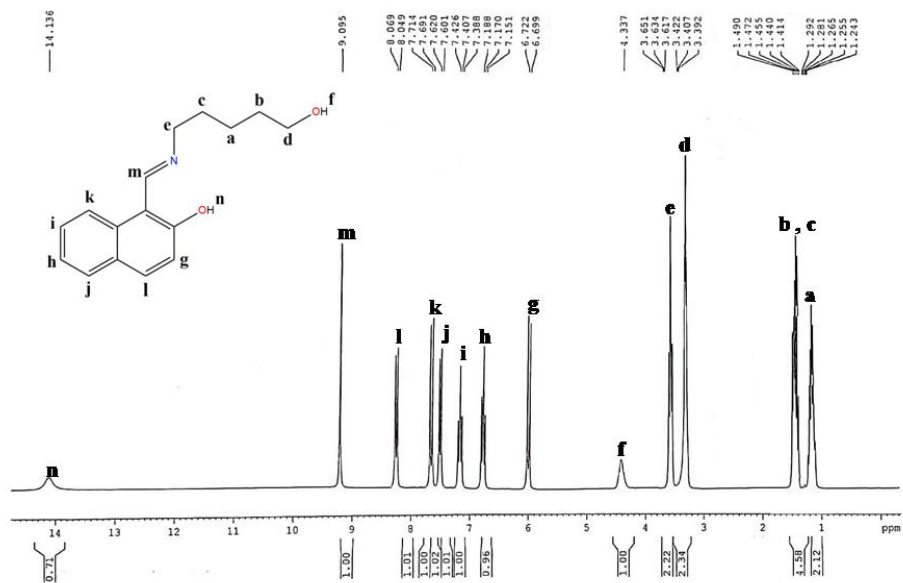

Fig. S5 <sup>1</sup>H NMR spectrum of HL<sup>2</sup> in DMSO-d<sub>6</sub>.

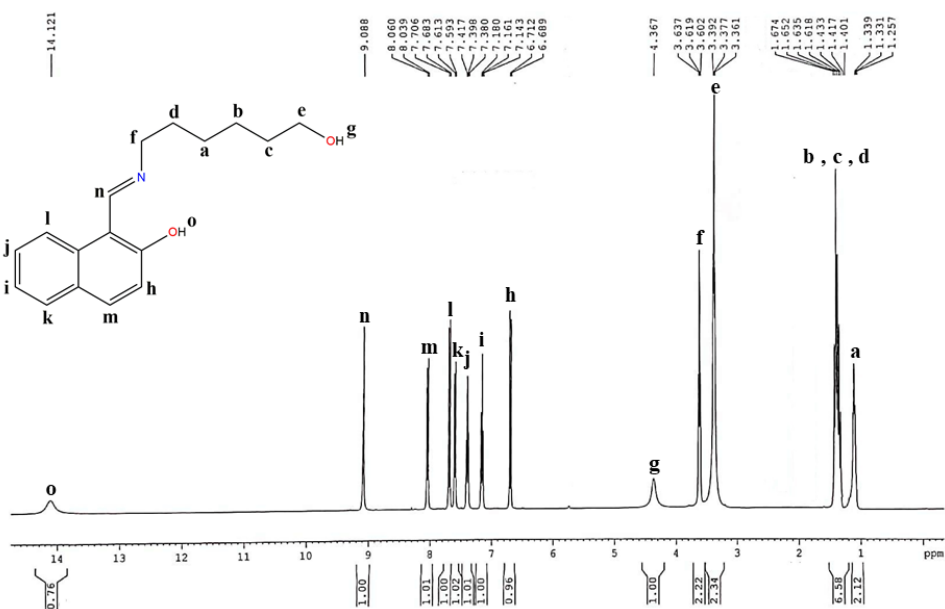

Fig. S6 <sup>1</sup>H NMR spectrum of HL<sup>3</sup> in DMSO-d<sub>6</sub>.

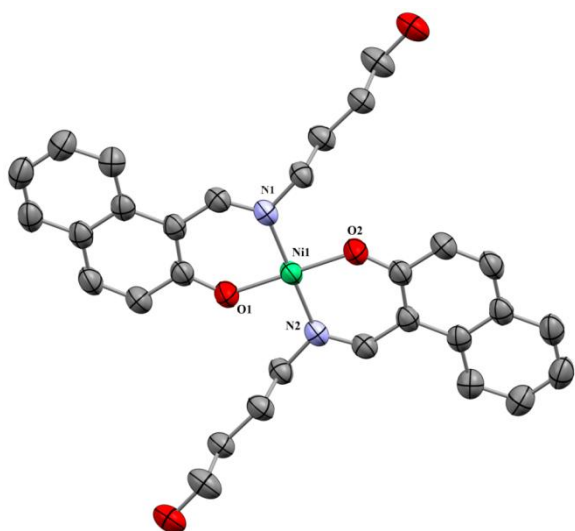

**Fig. S7** A perspective view of complex **1** with displacement ellipsoids drawn at the 50% probability level. Symmetry code; (a)  $-x, 1-y, 1-z$

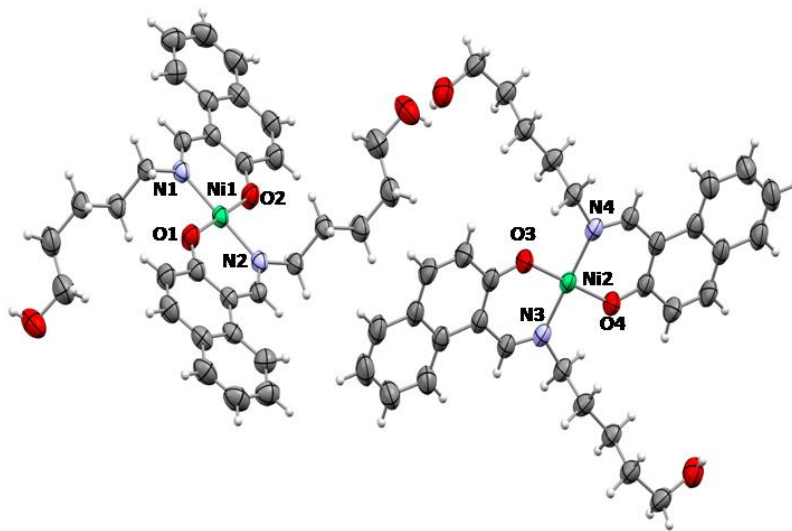

**Fig. S8** A perspective view of complex **2** with displacement ellipsoids drawn at the 50% probability level. Symmetry code; (a)  $-x, 1-y, 1-z$

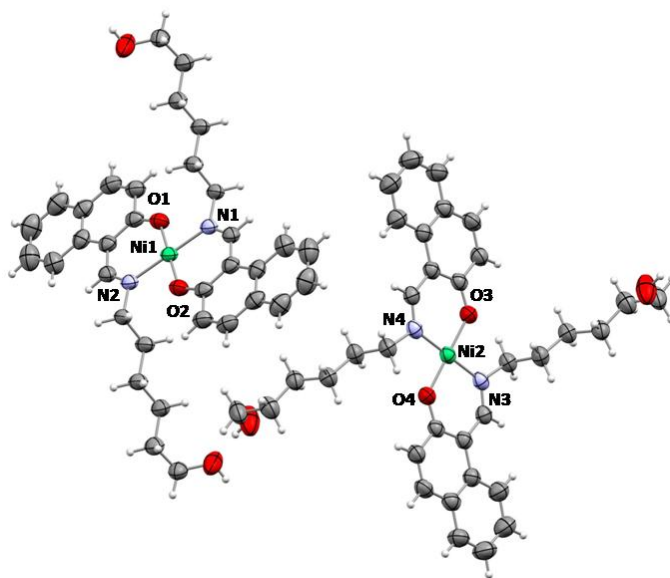

**Fig. S9** A perspective view of complex **3** with displacement ellipsoids drawn at the 50% probability level. Symmetry code; (a)  $1-x, -y, 2-z$

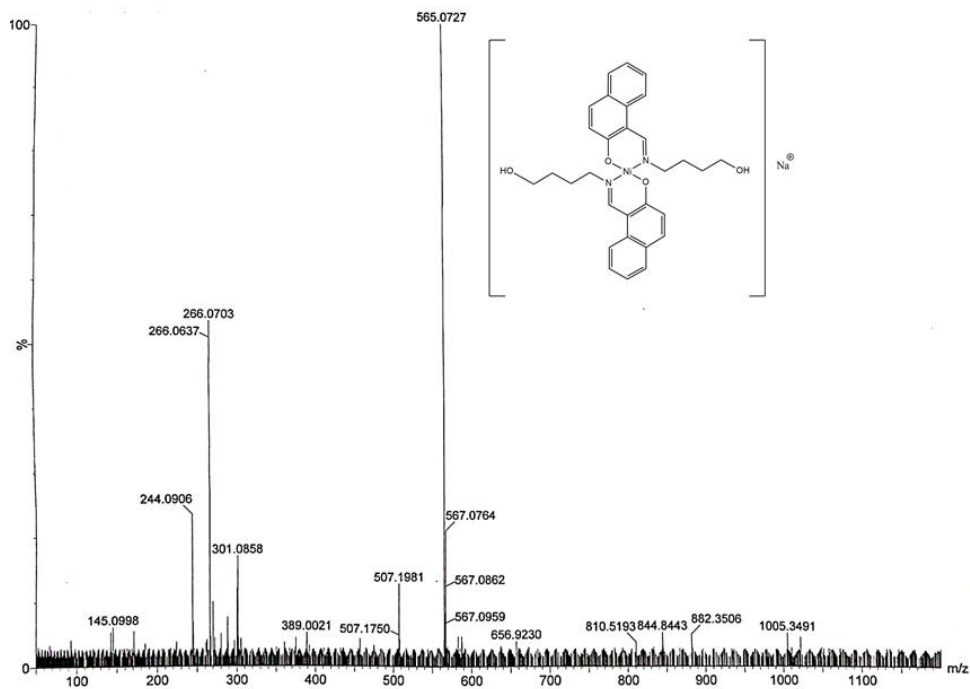

Fig. S10 Mass spectrum of Complex 1 in methanol.

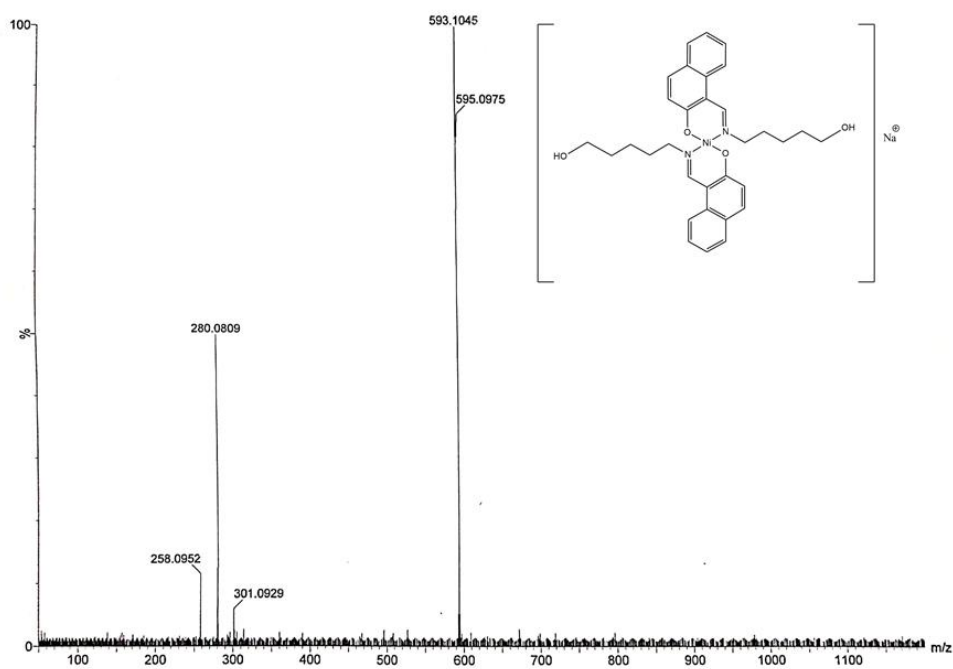

Fig. S11 Mass spectrum of Complex 2 in methanol.

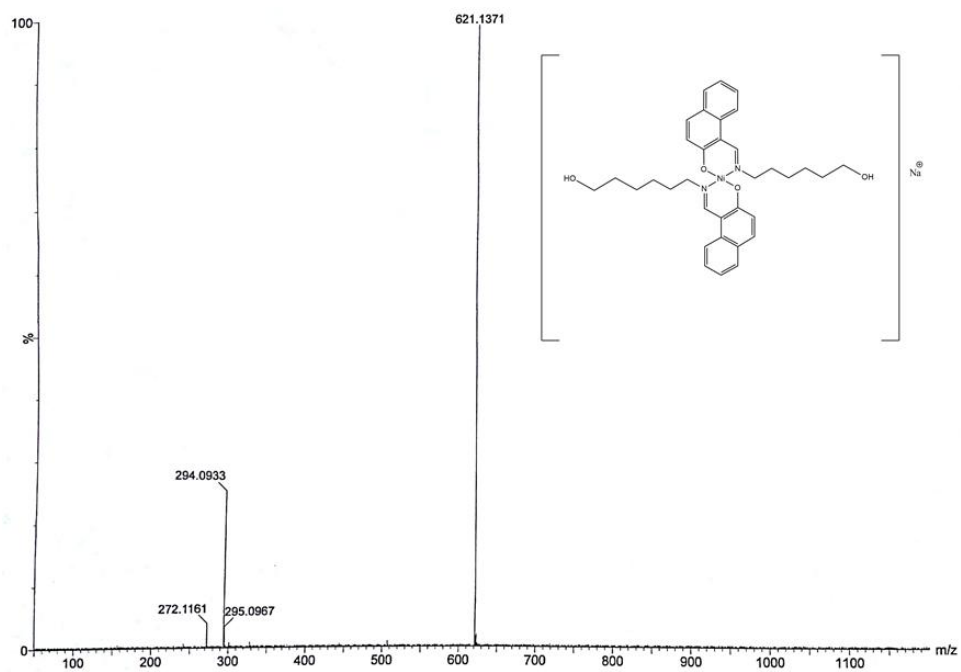

**Fig. S12** Mass spectrum of Complex 3 in methanol.

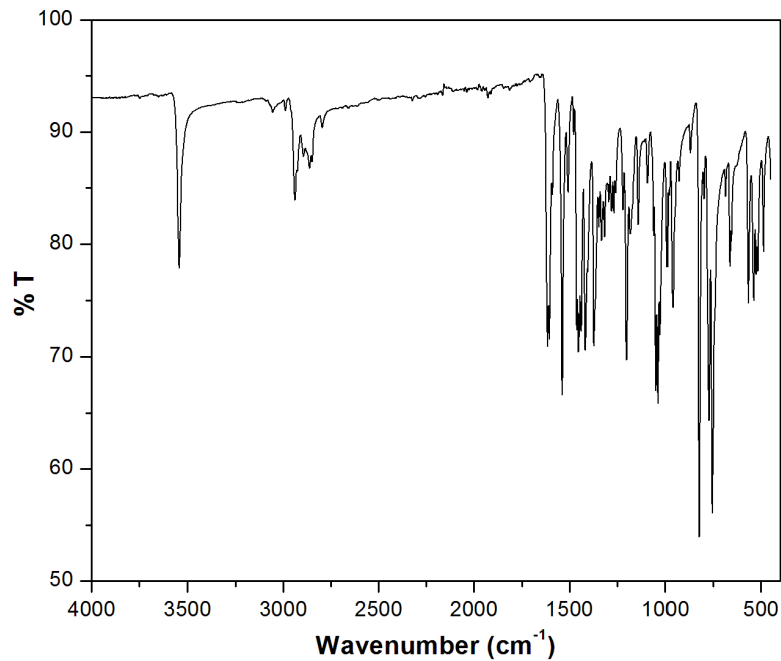

**Fig. S13** FT-IR spectrum of Complex 1.



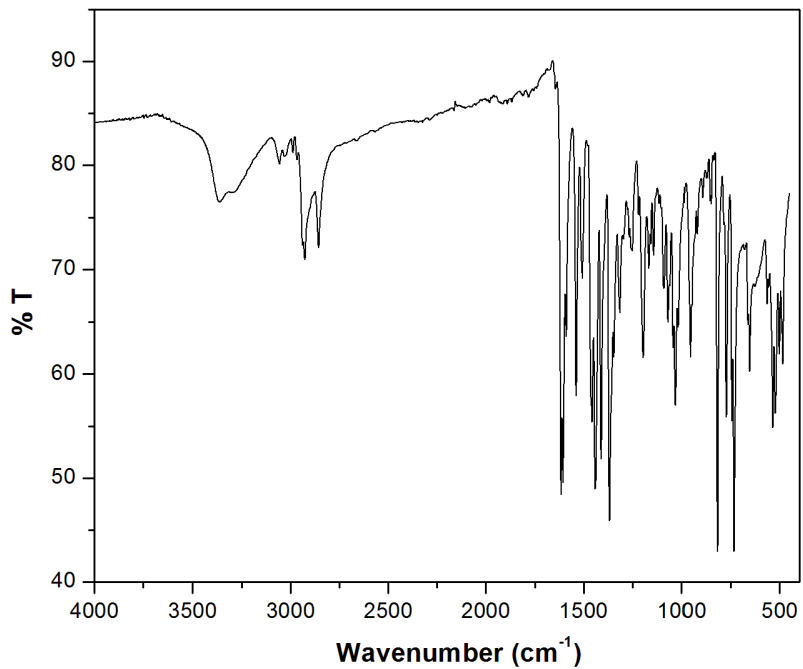

**Fig. S14** FT-IR spectrum of Complex 2.

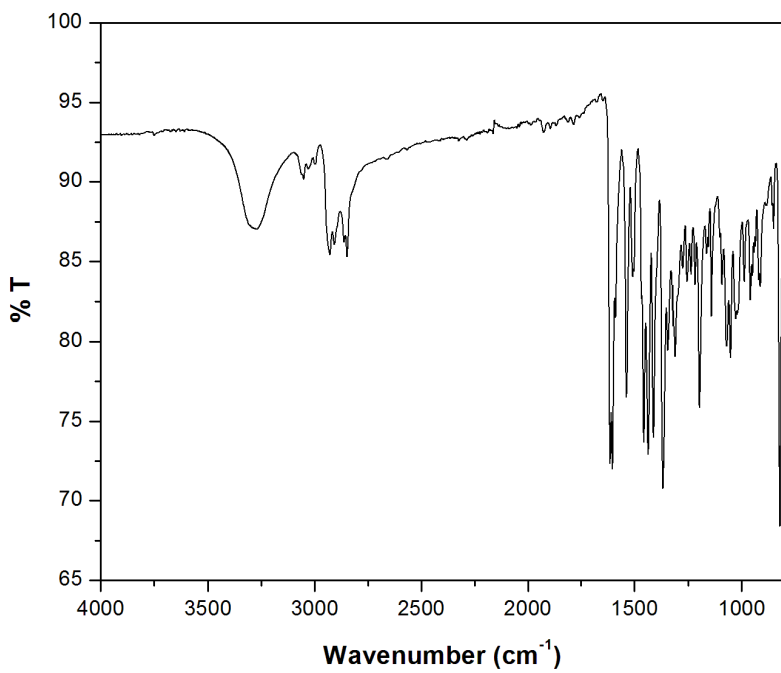

**Fig. S15** FT-IR spectrum of Complex 3.

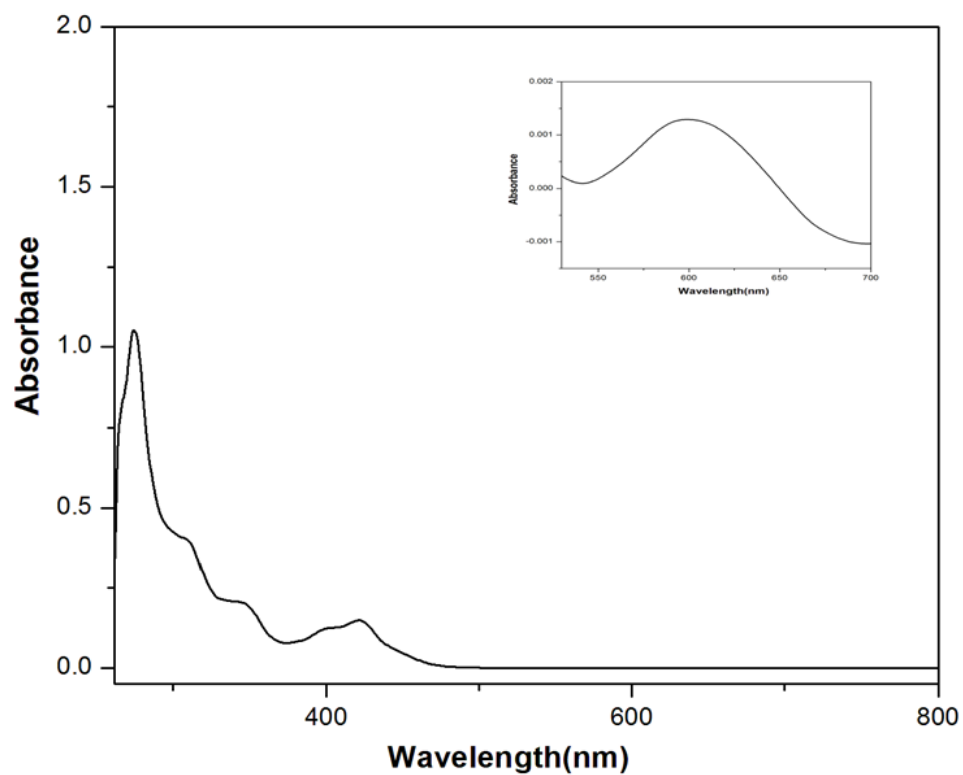

**Fig. S16** UV-vis spectrum of complex **1** in DMF

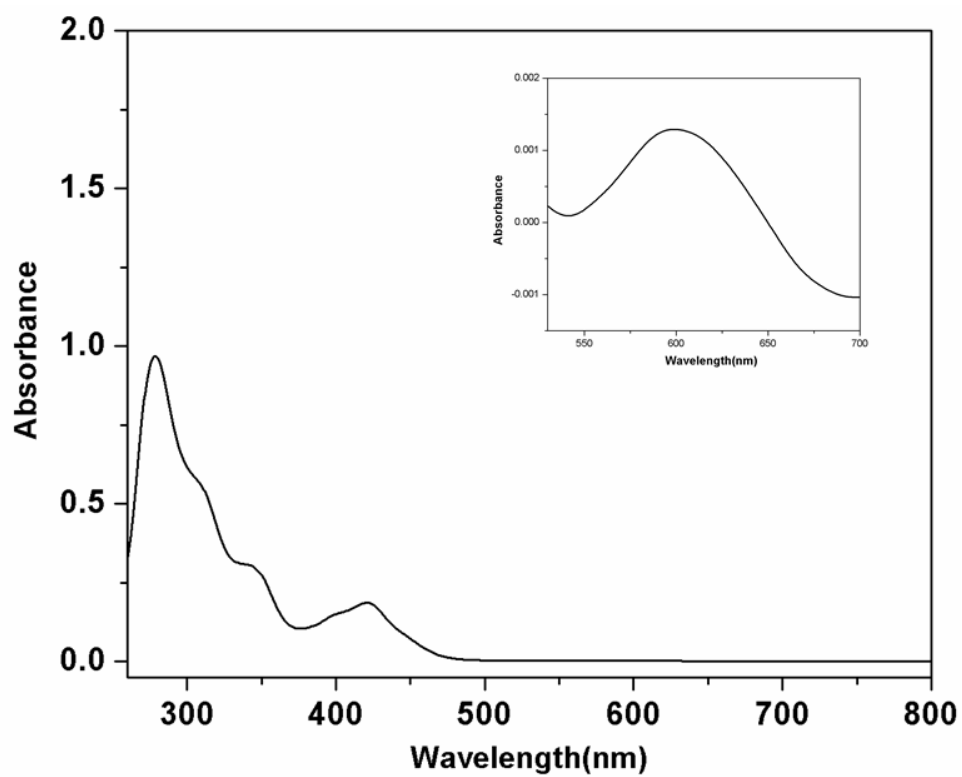

**Fig. S17** UV-vis spectrum of complex **2** in DMF

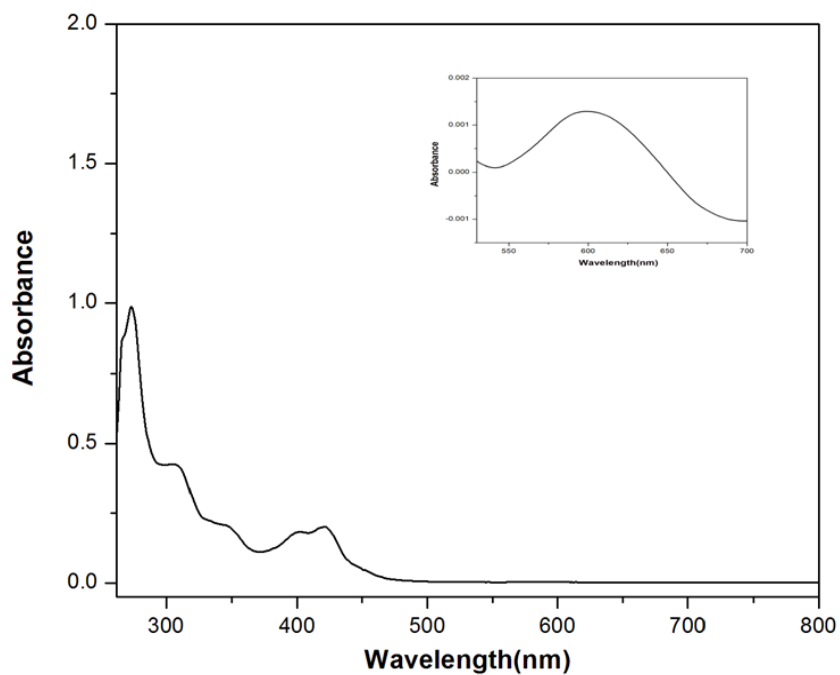

Fig. S18 UV-vis spectrum of complex **3** in DMF

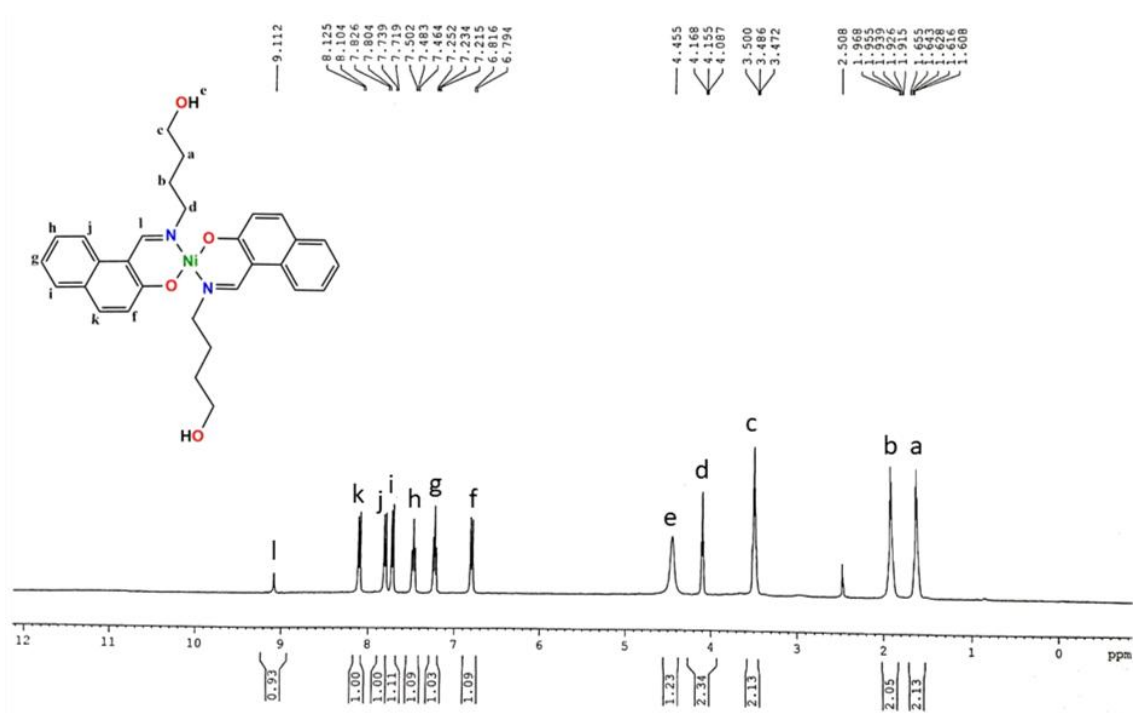

Fig. S19  $^1\text{H}$  NMR spectrum of complex **1** in  $\text{DMSO-d}_6$ .

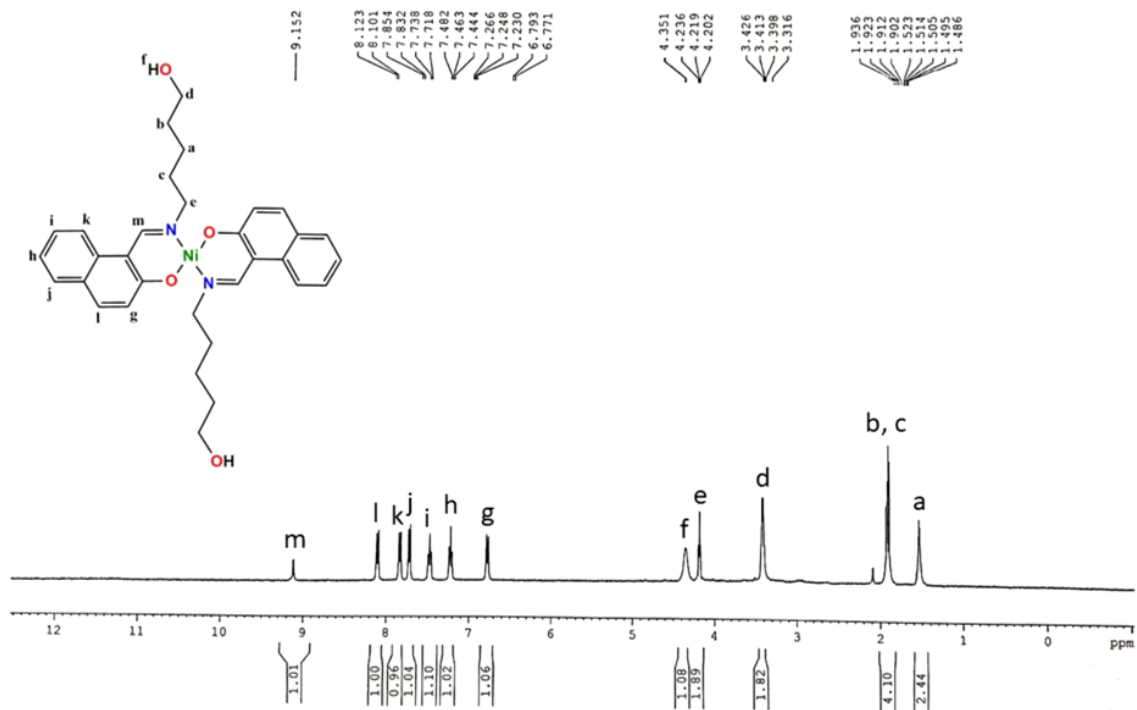

Fig. S20  $^1\text{H}$  NMR spectrum of complex 2 in DMSO- $d_6$ .

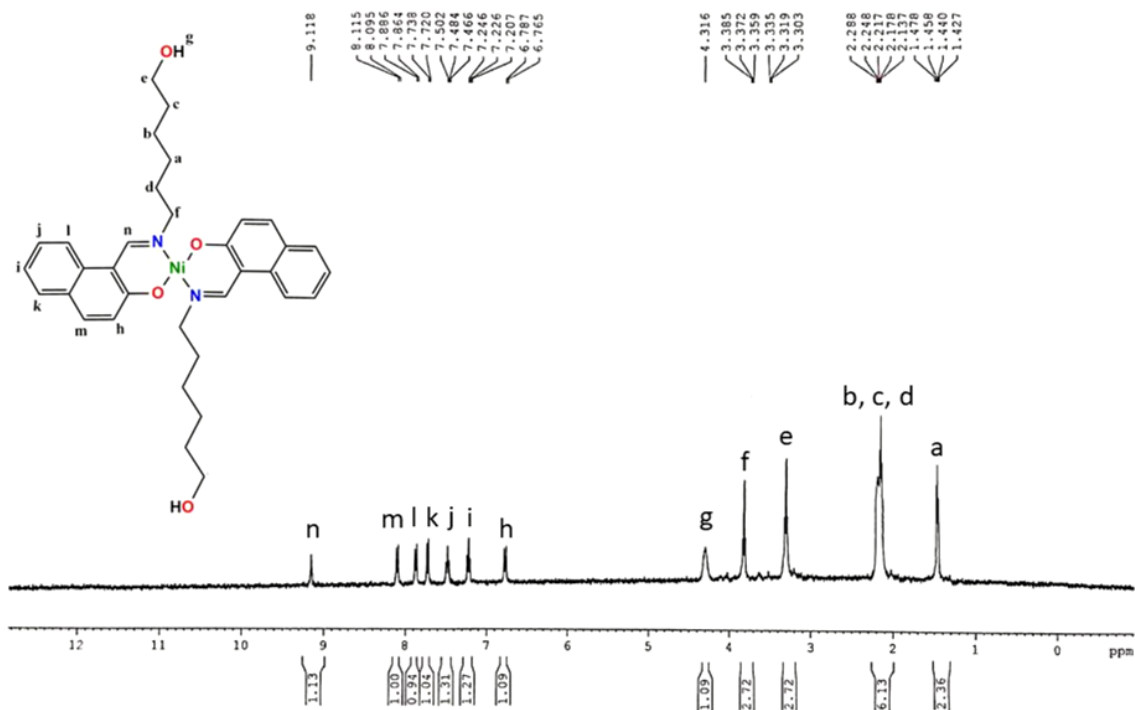

Fig. S21  $^1\text{H}$  NMR spectrum of complex 3 in DMSO- $d_6$ .

### Calculation of $E_{1/2}$ with respect to nHE of $Fc/Fc^+$

$$\begin{aligned} E \text{ vs. nHE} &= [\text{value obtained against Ag/AgCl, Cl}^- + 0.224 \text{ V (Potential of Ag/AgCl, Cl}^- \text{ electrode)} - \\ &0.200 \text{ V (Liquid junction potential of saturated aqueous KCl solution with DMF)}] \\ &= [0.535 + 0.224 - 0.200] \text{ V} \\ &= 0.559 \text{ V} \end{aligned}$$

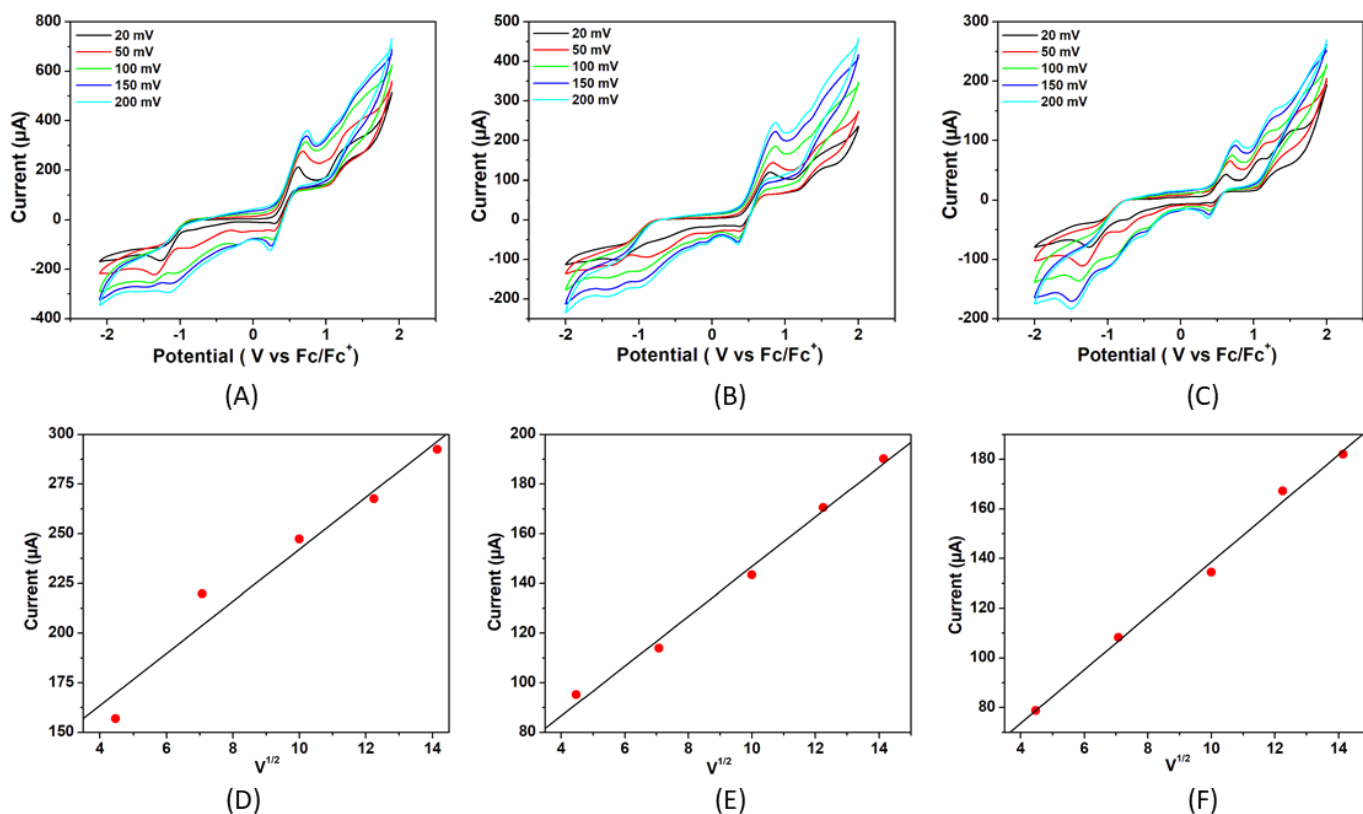

**Fig. S22** Scan rate dependence of precatalytic waves for 5.36  $\mu\text{M}$  solutions of complexes (A)**1**, (B)**2** and (C)**3** at scan rate from 20 to 200 mV/s in air free DMF solutions with 0.1M [n-Bu<sub>4</sub>N]Bras supporting electrolyte and Cottrell plot of peak current versus the square root of scan rate for complexes (D) **1**, (E) **2** and (F) **3**.

### Determination of Diffusion Coefficient (D) for complex 1, 2 and 3

Using the Randles-Sevcik equation,

$$i_p = 0.4463 \left( \frac{n^3 F^3}{RT} \right)^{1/2} A[cat](Dv)^{1/2} \dots\dots\dots(1)$$

Where,  $i_p$  = Peak current (amperes),  $n$  = Number of electrons transferred in a redox cycle,  $F$  = Faraday's constant (96485C/mol),  $R$  = Universal gas constant (8.314 J.K<sup>-1</sup>.mol<sup>-1</sup>),  $T$  = Absolute temperature (298 K),  $A$  = The electrode surface area in working (0.07 cm<sup>2</sup>),  $C$  = Molar concentration of redox-active species (mol/cm<sup>3</sup>),  $D$  = The diffusion coefficient (cm<sup>2</sup>/s),  $v$  = Scan rate in V/s.

Plotting peak current ( $i_p$ ) versus the square root of the scan rate ( $v$ )<sup>1/2</sup>

$$\text{Slope} = 0.4463 \left( \frac{n^3 F^3}{RT} \right)^{1/2} A[cat](D)^{1/2} \dots\dots\dots(2)$$

| Complex | Slope                 | Diffusion coefficient (cm <sup>2</sup> /s) |
|---------|-----------------------|--------------------------------------------|
| 1       | $1.31 \times 10^{-5}$ | $1.07 \times 10^{-5}$                      |
| 2       | $1.11 \times 10^{-5}$ | $0.77 \times 10^{-5}$                      |
| 3       | $1.08 \times 10^{-5}$ | $0.72 \times 10^{-5}$                      |

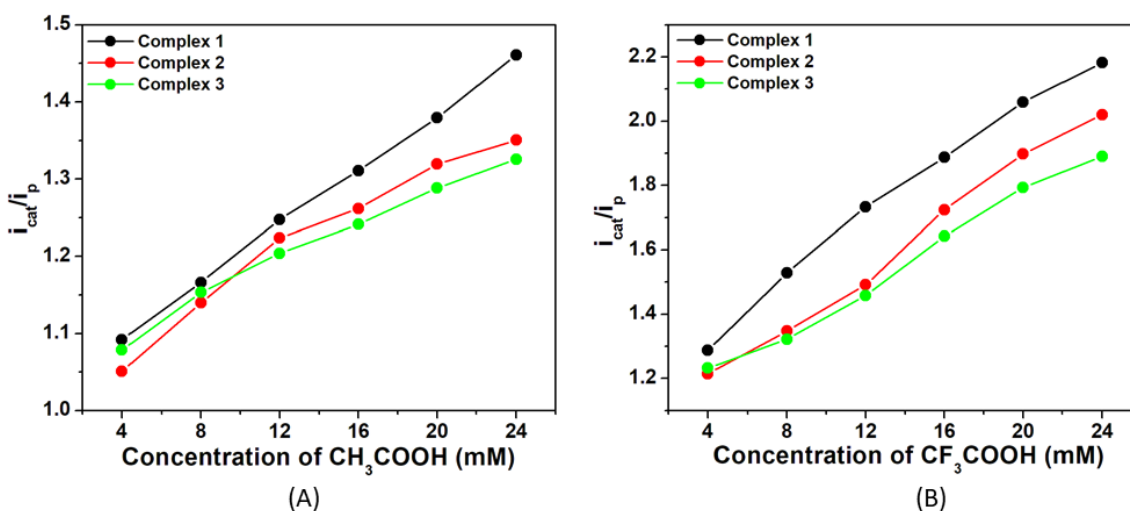

**Fig. S23** Plot of  $i_{cat}/i_p$  vs [Acid] for 5.36  $\mu$ M of complexes **1**, **2** and **3**.

### Over potential Calculations:

Calculations of  $E_{1/2}^T$  ( $= E_{\text{ref}}$ ) and  $\eta$  using  $E_{\text{H}^+/\text{H}_2}^0$ ,  $pK_a$ ,  $\epsilon_D$  and  $C_{\text{H}_2}^0$  using Fourmond's approach.<sup>1</sup>

$$E_{1/2}^T = E_{\text{H}^+/\text{H}_2}^0 - 2.303 \frac{RT}{F} pK_a + \epsilon_D - \frac{RT}{2F} \ln \frac{C_0}{C_{\text{H}_2}^0}$$

$E_{1/2}^T$  for Complexes 1, 2, 3 with 24.00 mM  $\text{CH}_3\text{COOH}$  in DMF

$$E_{1/2}^T = (-0.62) - 2.303 \frac{8.314 \times 298}{96485} 13.5 + 0.04 - \frac{8.314 \times 298}{2 \times 96485} \ln \frac{24}{1.9}$$
$$E_{1/2}^T = -1.41 \text{ vs } \text{Fc}^+/\text{Fc}$$

| Complex | Overpotential              |
|---------|----------------------------|
| 1       | $-1.41 - (-0.888) = -0.52$ |
| 2       | $-1.41 - (-0.853) = -0.55$ |
| 3       | $-1.41 - (-0.849) = -0.56$ |

$E_{1/2}^T$  for Complexes 1, 2, 3 with 24.00 mM  $\text{CF}_3\text{COOH}$  in DMF

$$E_{1/2}^T = (-0.62) - 2.303 \frac{8.314 \times 298}{96485} 6.0 + 0.04 - \frac{8.314 \times 298}{2 \times 96485} \ln \frac{24}{1.9}$$
$$E_{1/2}^T = -0.96 \text{ vs } \text{Fc}^+/\text{Fc}$$

| Complex | Overpotential              |
|---------|----------------------------|
| 1       | $-0.96 - (-0.733) = -0.22$ |
| 2       | $-0.96 - (-0.723) = -0.23$ |
| 3       | $-0.96 - (-0.713) = -0.24$ |

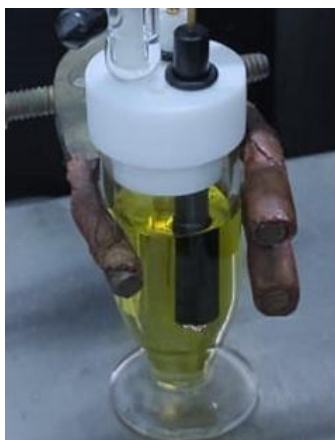

**Fig. S24** Photograph of the customized, one-compartment, three-neck cell with a glassy carbon working electrode.  $\text{H}_2$  gas bubbles are appeared on the surface of the working electrode.

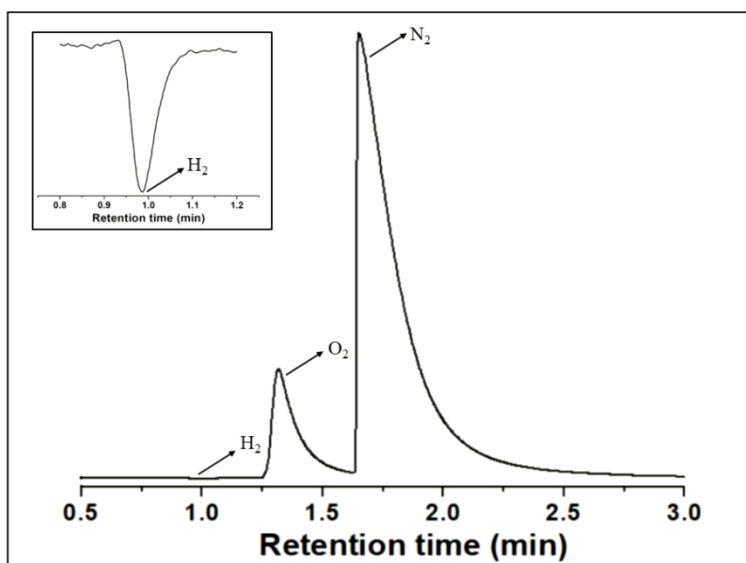

**Fig. S25** Gas chromatogram of the headspace gas obtained after bulk electrolysis of a  $\text{N}_2$  saturated 0.5 mM solution of complex **1** containing 24 mM TFA. The headspace gas was analyzed after 30 min of electrolysis. Inset: Detection region of evolved  $\text{H}_2$  gas.



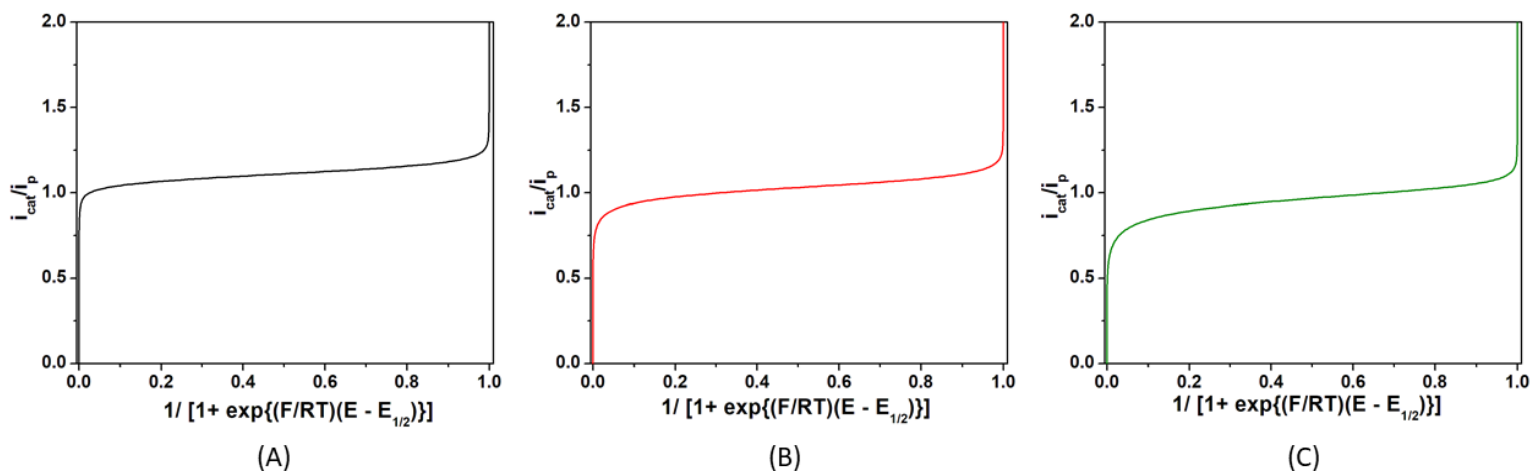

**Fig. S26** Plot of  $i_{\text{cat}}/i_p$  vs.  $1/(1+\exp[(F/RT)(E-E_{1/2})])$  using FOWA of 5.36  $\mu\text{M}$  of (A) complex **1** (B) complex **2** and (C) complex **3** with 24 mM  $\text{CH}_3\text{COOH}$  in DMF.

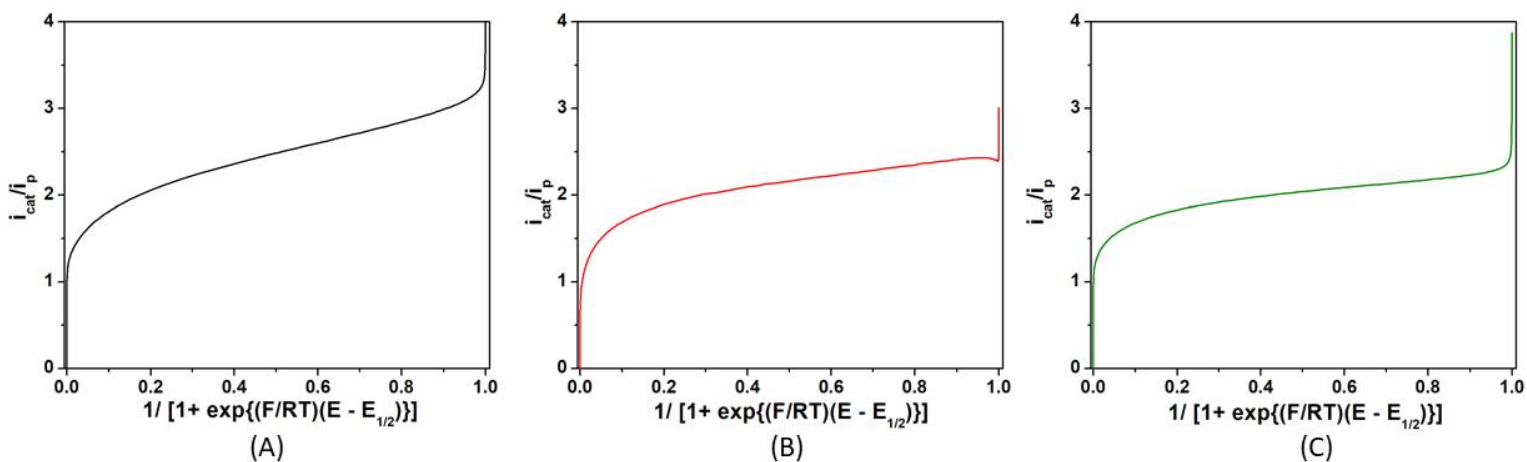

**Fig. S27** Plot of  $i_{\text{cat}}/i_p$  vs.  $1/(1+\exp[(F/RT)(E-E_{1/2})])$  using FOWA of 5.36  $\mu\text{M}$  of (A) complex **1** (B) complex **2** and (C) complex **3** with 24 mM  $\text{CF}_3\text{COOH}$  in DMF.

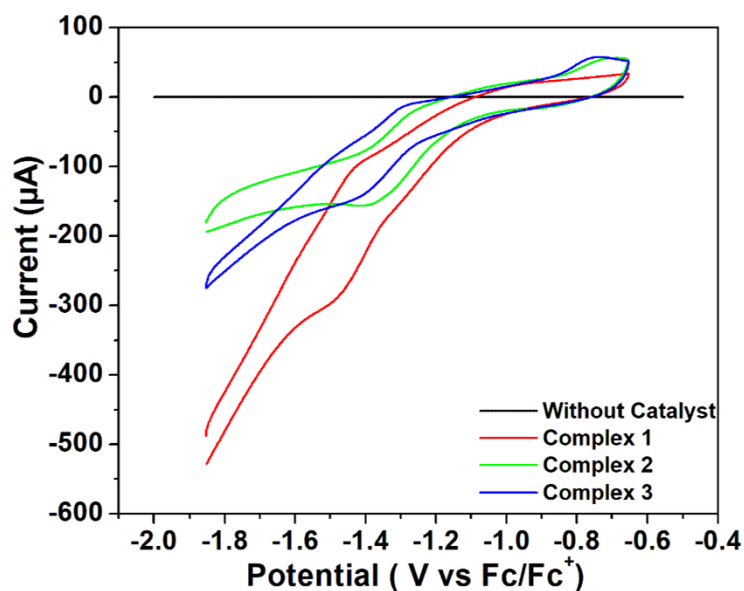

**Fig. S28** CVs showing blank DMF with 24 mM  $\text{CH}_3\text{COOH}$  added (black) and with 24 mM  $\text{CH}_3\text{COOH}$  in the presence of 5.36  $\mu\text{M}$  complex **1** (red), complex **2** (green), complex **3** (blue). Conditions: room temperature, 0.1 M  $[\text{n-Bu}_4\text{N}]\text{Br}$  as supporting electrolyte, scan rate = 50 mV/s, glassy carbon working electrode, Pt wire counter electrode and the potential is referenced against  $\text{Fc}/\text{Fc}^+$ .

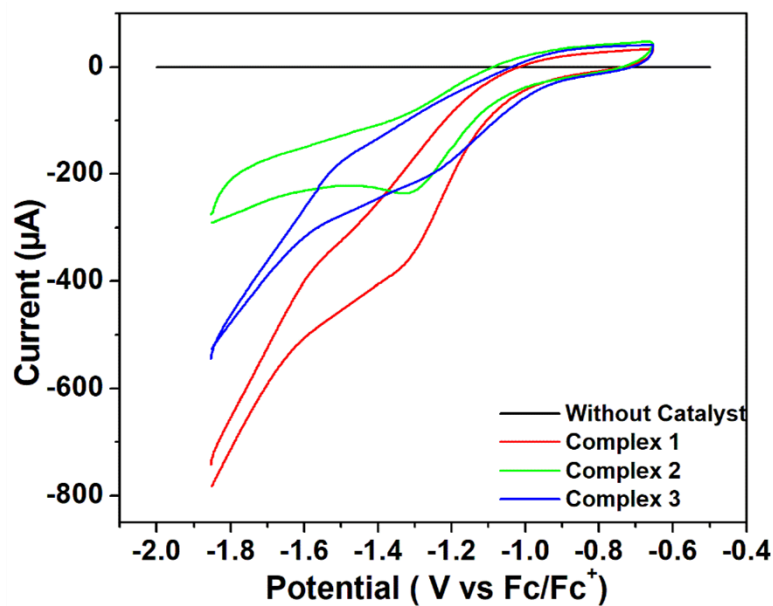

**Fig. S29** CVs showing blank DMF with 24 mM  $\text{CF}_3\text{COOH}$  added (black) and with 24 mM  $\text{CH}_3\text{COOH}$  in the presence of 5.36  $\mu\text{M}$  complex **1** (red), complex **2** (green), complex **3** (blue). Conditions: room temperature, 0.1 M  $[\text{n-Bu}_4\text{N}]\text{Br}$  as supporting electrolyte, scan rate = 50 mV/s, glassy carbon working electrode, Pt wire counter electrode and the potential is referenced against  $\text{Fc}/\text{Fc}^+$ .

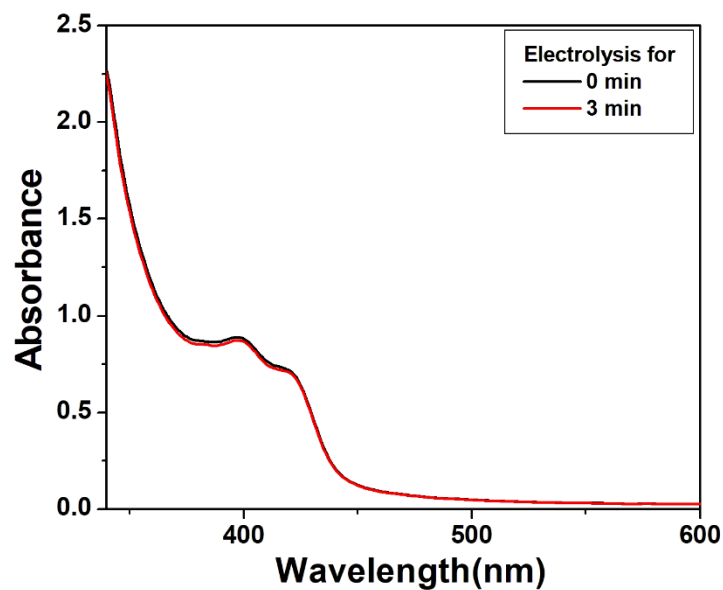

**Fig. S30** UV-Vis spectra of complex **1** in DMF during electrolysis under  $-1.50$  V versus  $\text{Fc}/\text{Fc}^+$ .

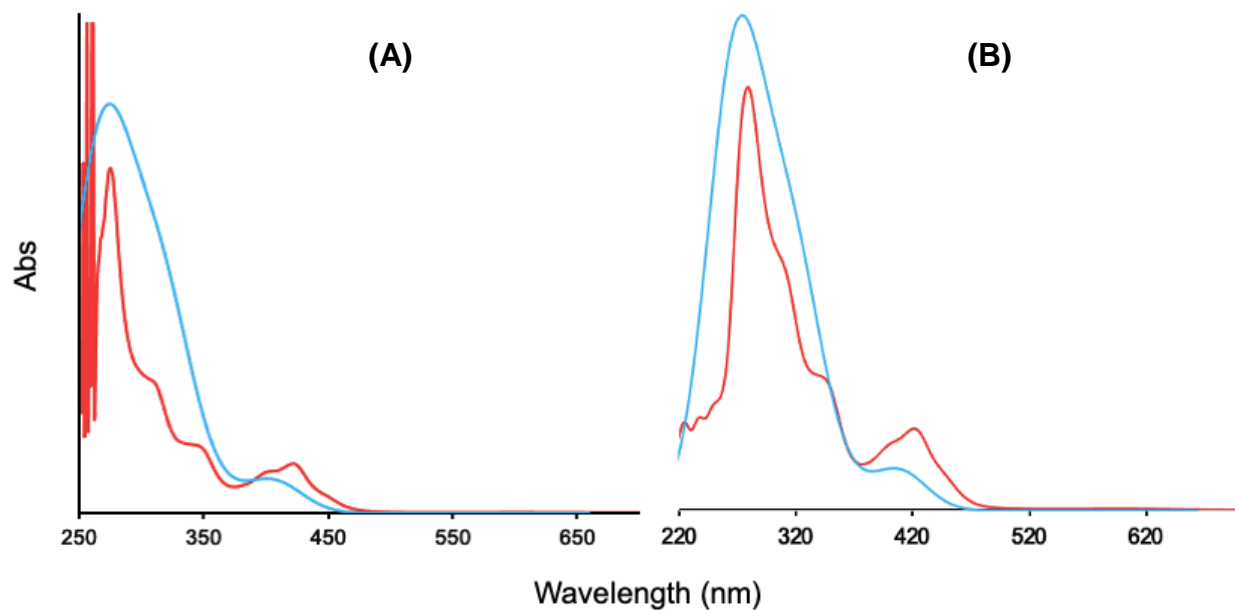

**Fig. S31** TDDFTUV-Vis spectra of (A) complex **1** and (B) complex **2** (blue: calculated and red: experimental).

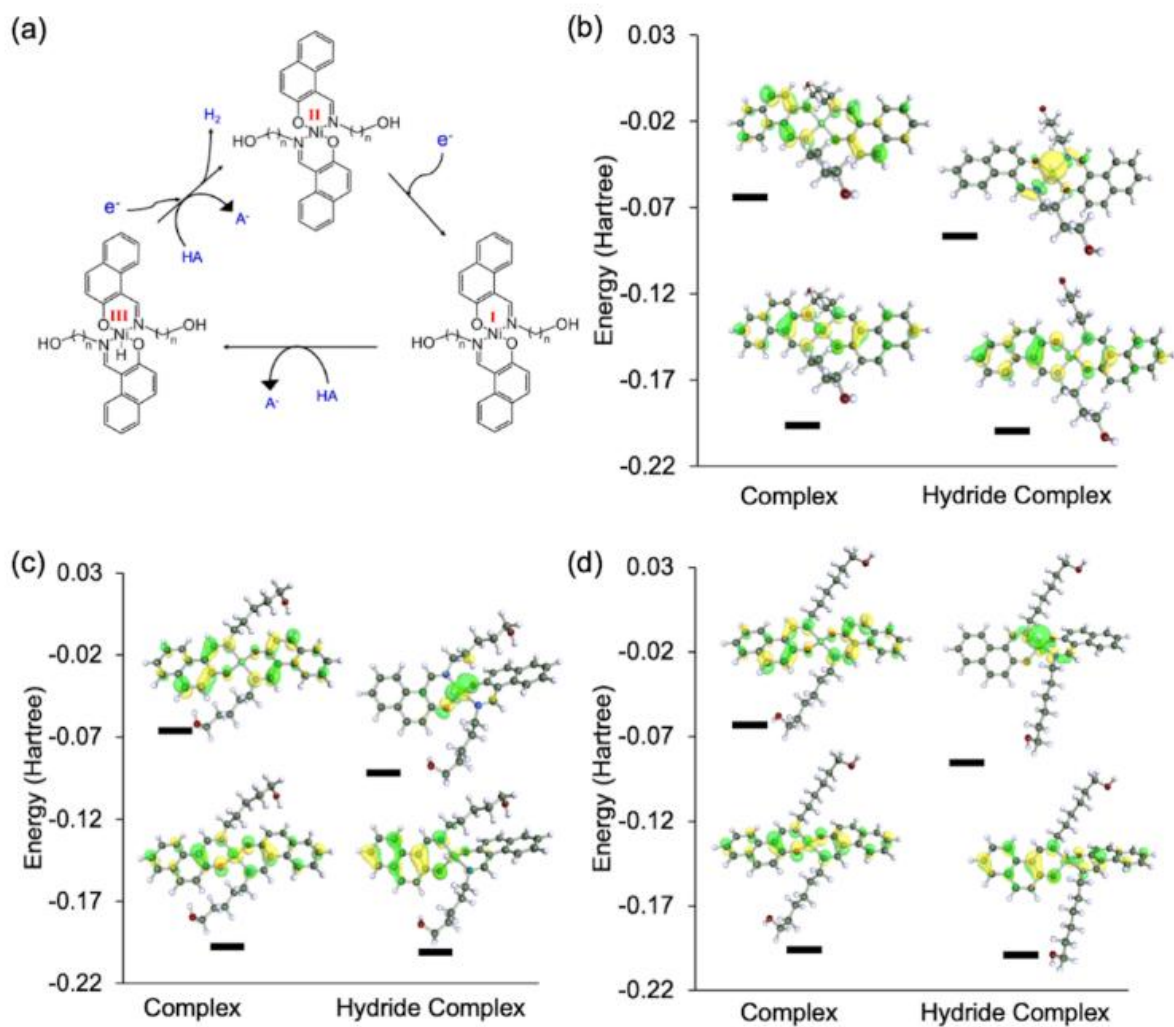

**Fig. S32** (a) Plausible mechanistic pathway of HER by complexes **1**, **2** and **3** ( $n = 4, 5$  and  $6$ ); (b-d) HOMO-LUMO electronic distribution for complexes **1**, **2** and **3** and their hydride complex derivative.

**Table S1** Selected bond lengths (Å) and bond angles (°) of complexes **1**, **2** and **3**.

**Complex 1**

|                                      |        |
|--------------------------------------|--------|
| Ni1–O1                               | 1.8261 |
| Ni1–O1 <sup>a</sup>                  | 1.8261 |
| Ni1–N1                               | 1.9106 |
| Ni1–N1 <sup>a</sup>                  | 1.9106 |
| O1–Ni1–O1 <sup>a</sup>               | 180.00 |
| O1 <sup>a</sup> –Ni1–N1 <sup>a</sup> | 92.14  |
| O1 <sup>a</sup> –Ni1–N1              | 87.86  |
| O1–Ni1–N1 <sup>a</sup>               | 87.86  |
| O1–Ni1–N1                            | 92.14  |
| N1–Ni1–N1 <sup>a</sup>               | 180.00 |

**Complex 2**

|                                      |        |
|--------------------------------------|--------|
| Ni1–O1                               | 1.8226 |
| Ni1–O1 <sup>a</sup>                  | 1.8226 |
| Ni1–N1                               | 1.9164 |
| Ni1–N1 <sup>a</sup>                  | 1.9164 |
| O1–Ni1–O1 <sup>a</sup>               | 180.00 |
| O1–Ni1–N1                            | 92.13  |
| O1–Ni1–N1 <sup>a</sup>               | 87.87  |
| O1 <sup>a</sup> –Ni1–N1              | 87.87  |
| O1 <sup>a</sup> –Ni1–N1 <sup>a</sup> | 92.13  |
| N1–Ni1–N1 <sup>a</sup>               | 180.00 |

**Complex 3**

|                                      |        |
|--------------------------------------|--------|
| Ni1–O1 <sup>a</sup>                  | 1.8310 |
| Ni1–O1                               | 1.8310 |
| Ni1–N1 <sup>a</sup>                  | 1.9162 |
| Ni1–N1                               | 1.9162 |
| O1–Ni1–O1 <sup>a</sup>               | 180.00 |
| O1–Ni1–N1 <sup>a</sup>               | 88.44  |
| O1–Ni1–N1                            | 91.56  |
| O1 <sup>a</sup> –Ni1–N1 <sup>a</sup> | 91.56  |
| O1 <sup>a</sup> –Ni1–N1              | 88.44  |
| N1–Ni1–N1 <sup>a</sup>               | 180.00 |

**Table S2** Assignment of different IR spectral bands of Complexes **1**, **2** and **3**

| Complex | $\nu$ (cm <sup>-1</sup> ) | Assigned for       |
|---------|---------------------------|--------------------|
| 1       | 3536                      | O–H stretching     |
| 2       | 3316                      |                    |
| 3       | 3272                      |                    |
| 1       | 2939                      | aromatic C-H bond  |
| 2       | 2933                      |                    |
| 3       | 2934                      |                    |
| 1       | 2855                      | aliphatic C-H bond |
| 2       | 2854                      |                    |
| 3       | 2851                      |                    |
| 1       | 1657                      | azomethine group   |
| 2       | 1658                      |                    |
| 3       | 1642                      |                    |
| 1       | 486                       | metal-nitrogen     |
| 2       | 485                       |                    |
| 3       | 479                       |                    |
| 1       | 562                       | metal-oxygen       |
| 2       | 534                       |                    |
| 3       | 532                       |                    |

**Table S3** Assignment of different UV-vis spectral bands of Complexes **1**, **2** and **3**

| Complex | $\pi-\pi^*$ (phenolic chromophore) | $\epsilon$ (M <sup>-1</sup> cm <sup>-1</sup> ) | $\pi-\pi^*$ (C=N and benzene ring) | $\epsilon$ (M <sup>-1</sup> cm <sup>-1</sup> ) | $n-\pi^*$ (C=N) | $\epsilon$ (M <sup>-1</sup> cm <sup>-1</sup> ) | LMCT | $\epsilon$ (M <sup>-1</sup> cm <sup>-1</sup> ) | $d-d$ | $\epsilon$ (M <sup>-1</sup> cm <sup>-1</sup> ) |
|---------|------------------------------------|------------------------------------------------|------------------------------------|------------------------------------------------|-----------------|------------------------------------------------|------|------------------------------------------------|-------|------------------------------------------------|
| 1       | 275                                | 10500                                          | 312                                | 4000                                           | 348             | 2000                                           | 424  | 1500                                           | 600   | 30                                             |
| 2       | 279                                | 9500                                           | 310                                | 5700                                           | 345             | 2500                                           | 420  | 1800                                           | 596   | 30                                             |
| 3       | 274                                | 9600                                           | 307                                | 4200                                           | 347             | 2000                                           | 421  | 1900                                           | 592   | 30                                             |

**Table S4** Few parameters of recently published complexes used for hydrogen evolution reaction

| Entry | Complex                                                                                                                                                 | Medium | Source                                      | Overpotential (V) |
|-------|---------------------------------------------------------------------------------------------------------------------------------------------------------|--------|---------------------------------------------|-------------------|
| 1     | 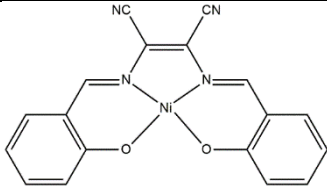 <p>(<i>Int. J. Hydrogen Energy</i> <b>2014</b>, <i>39</i>, 10980)</p> | DMF    | CH <sub>3</sub> COOH                        | 0.320             |
| 2     |  <p>(<i>Inorg. Chem.</i> <b>2018</b>, <i>57</i>, 21, 13486)</p>        | DMF    | CH <sub>3</sub> COOH                        | 0.85              |
|       |                                                                                                                                                         |        | CF <sub>3</sub> COOH                        | -----             |
|       |                                                                                                                                                         | ACN    | CH <sub>3</sub> COOH                        | 0.53              |
|       |                                                                                                                                                         |        | CF <sub>3</sub> COOH                        | 0.67              |
| 3     |  <p>(<i>Dalton Trans.</i>, <b>2019</b>, <i>48</i>, 14653)</p>        | ACN    | CF <sub>3</sub> COOH                        | 0.93              |
| 4     |  <p>(<i>Inorg. Chem.</i> <b>2020</b>, <i>59</i>, 1038)</p>           |        | H <sub>2</sub> -saturated basic (1.0 M KOH) | 0.364             |

|    |                                                                                                                                                  |     |                      |         |
|----|--------------------------------------------------------------------------------------------------------------------------------------------------|-----|----------------------|---------|
| 5  | 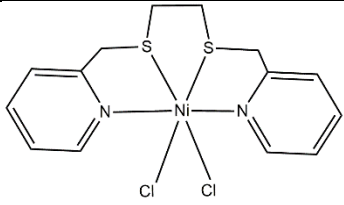 <p>(<i>Int. J. Hydrogen Energy</i> <b>2018</b>, 43, 19047)</p> |     | Neutral<br>buffer    | 0.837   |
| 6  |  <p>(<i>Applied Catalysis B</i> <b>2017</b>, 219, 353–361)</p>  |     | Neutral<br>buffer    | 0.837.6 |
| 7  |  <p>(<i>ACS Catal.</i> <b>2015</b>, 5, 356–364)</p>            | ACN | HClO <sub>4</sub>    | 1.07    |
| 8  | Complex <b>1</b><br>(Present study)                                                                                                              | DMF | CH <sub>3</sub> COOH | 0.52    |
|    |                                                                                                                                                  |     | CF <sub>3</sub> COOH | 0.22    |
| 9  | Complex <b>2</b><br>(Present study)                                                                                                              | DMF | CH <sub>3</sub> COOH | 0.55    |
|    |                                                                                                                                                  |     | CF <sub>3</sub> COOH | 0.23    |
| 10 | Complex <b>3</b><br>(Present study)                                                                                                              | DMF | CH <sub>3</sub> COOH | 0.56    |
|    |                                                                                                                                                  |     | CF <sub>3</sub> COOH | 0.24    |



**Table S5 TON Calculations**

| Complex in DMF | Proton source        | $q_{\text{total}} = q_{\text{cat}} - q_{\text{blank}}$ | Theoretical moles of hydrogen produced = $\frac{q_{\text{total}}}{96485 \text{ C}} \times (1 \text{ mol H}_2 / 2 \text{ mol e}^-)$ | Moles of catalyst used | TON = $\frac{\text{Theoretical moles of H}_2}{\text{Moles of catalyst used}}$ |
|----------------|----------------------|--------------------------------------------------------|------------------------------------------------------------------------------------------------------------------------------------|------------------------|-------------------------------------------------------------------------------|
| 1              | Acetic acid          | 0.62                                                   | $3.21 \times 10^{-6}$                                                                                                              | $1.34 \times 10^{-7}$  | 23.95                                                                         |
| 2              | Acetic acid          | 0.40                                                   | $2.07 \times 10^{-6}$                                                                                                              |                        | 15.45                                                                         |
| 3              | Acetic acid          | 0.33                                                   | $1.71 \times 10^{-6}$                                                                                                              |                        | 12.76                                                                         |
| 1              | Trifluoroacetic acid | 1.30                                                   | $6.74 \times 10^{-6}$                                                                                                              |                        | 50.30                                                                         |
| 2              | Trifluoroacetic acid | 0.50                                                   | $2.59 \times 10^{-6}$                                                                                                              |                        | 19.33                                                                         |
| 3              | Trifluoroacetic acid | 0.38                                                   | $1.97 \times 10^{-6}$                                                                                                              |                        | 14.70                                                                         |

**Faradaic Efficiency**

$$\text{Faradaic Efficiency} = \frac{\text{Quantified moles of H}_2}{\text{Theoretical moles of H}_2} \times 100\%$$

**Table S6 Calculations of Faradaic Efficiency**

| Complex | Proton Source        | Quantified moles of H <sub>2</sub> | Theoretical moles of H <sub>2</sub> ( $\times 10^{-6}$ ) | Faradaic Efficiency (%) |
|---------|----------------------|------------------------------------|----------------------------------------------------------|-------------------------|
| 1       | Acetic Acid          | 2.17                               | 3.21                                                     | 67.56                   |
| 2       |                      | 1.01                               | 2.07                                                     | 48.64                   |
| 3       |                      | 0.71                               | 1.71                                                     | 41.35                   |
| 1       | Trifluoroacetic acid | 5.51                               | 6.74                                                     | 81.78                   |
| 2       |                      | 1.59                               | 2.59                                                     | 61.41                   |
| 3       |                      | 1.17                               | 1.97                                                     | 59.58                   |

### TOF Calculations:

For homogenous, diffusion controlled process the peak current can be given by Randle Sevcik equation

$$i_p = 0.4463FSC_p^0 \sqrt{\frac{FvD}{RT}} \dots \dots \dots (3)$$

$$i_{cat} = \frac{2FSC_p^0 \sqrt{\frac{FvD}{RT}}}{1 + \exp\left[\frac{F}{RT}(E-E_{1/2})\right]} \dots \dots \dots (4)$$

where, F is the Faraday's constant, S is the surface of electrode,  $C_p^0$  is the concentration of the complex in solution, D is the diffusion coefficient,  $E_{1/2}$  the half-wave potential of the redox couple triggering catalysis, R is the gas constant and T is the absolute temperature. Combining the equation (3) and (4) we get the equation (5). The plot of  $i_{cat}/i_p$  vs  $1/(1+\exp[(F/RT)(E-E_{1/2})])$  gives access of the observed rate constant ( $k_{obs}$ ).

$$\frac{i_{cat}}{i_p} = \frac{2}{0.4463} \sqrt{\frac{RT(K_{obs})}{Fv}} \frac{1}{1 + \exp\left[\frac{F}{RT}(E-E_{1/2})\right]} \dots \dots \dots (5)$$

$$Slope = \frac{2}{0.4463} \sqrt{\frac{RT(K_{obs})}{Fv}} \dots \dots \dots (6)$$

**Table S7** TOF Calculations

| Complex | Proton Source        | Slope | $K_{obs}(s^{-1})$ | $C_H^0$ (M) | $K_{cat} = (K_{obs}/C_H^0)$<br>( $M^{-1}s^{-1}$ ) | TOF ( $s^{-1}$ ) |
|---------|----------------------|-------|-------------------|-------------|---------------------------------------------------|------------------|
| 1       | Acetic Acid          | 2.48  | 6.03              | 0.024       | 251.25                                            | 251.25           |
| 2       |                      | 1.81  | 3.21              |             | 133.75                                            | 133.75           |
| 3       |                      | 1.51  | 2.23              |             | 92.92                                             | 92.92            |
| 1       | Trifluoroacetic acid | 3.23  | 10.24             |             | 426.67                                            | 426.67           |
| 2       |                      | 2.15  | 4.53              |             | 188.75                                            | 188.75           |
| 3       |                      | 1.76  | 3.04              |             | 126.67                                            | 126.67           |

**Table S8** Bond length comparison of complex **1**, **2** and **3** as obtained from X-ray analysis with DFT calculation.

| Bond             | X-ray | DFT  |
|------------------|-------|------|
| <b>Complex 1</b> |       |      |
| Ni01-O002        | 1.83  | 1.85 |
| Ni01-N004        | 1.91  | 1.92 |
| Ni01-O002        | 1.83  | 1.85 |
| Ni01-N004        | 1.91  | 1.92 |
| <b>Complex 2</b> |       |      |
| Ni01-O003        | 1.82  | 1.85 |
| Ni01-N1          | 1.92  | 1.92 |
| Ni01-O003        | 1.82  | 1.85 |
| Ni01-N1          | 1.92  | 1.92 |
| <b>Complex 3</b> |       |      |
| Ni01-O005        | 1.83  | 1.85 |
| Ni01-N004        | 1.92  | 1.92 |
| Ni01-O005        | 1.83  | 1.85 |
| Ni01-N004        | 1.92  | 1.92 |

**Table S9** Geometry optimized coordinates of complex **1**.

total energy = -3079.28092039001 Hartree

69

Ni -0.1812007 2.4970776 11.9076476

O -0.1749657 0.9775928 12.9577034

O 4.9815981 5.0736901 8.1282899

H 5.3534333 4.7096971 7.3081285

N 1.3862858 3.1624347 12.8003888

C 2.8962795 3.5539209 10.8696046

H 2.1166079 3.1085832 10.2297787

H 3.5699795 2.7322229 11.1736389

C 1.7708520 2.7666758 13.9777065

H 2.6618940 3.2574726 14.3851504

C 1.6080544 1.5219652 16.1463630

C 3.6722377 4.6039554 10.0729258

H 3.0031725 5.4421519 9.8058481

H 4.4872369 5.0296167 10.6869702

C 1.1862177 1.7310688 14.7760899

C 0.2658074 0.8411647 14.1686448

C 1.1175796 0.3811674 16.8592170

C 2.2330970 4.1455430 12.1162939

|   |            |            |            |
|---|------------|------------|------------|
| H | 3.0068039  | 4.5068858  | 12.8153854 |
| H | 1.6059371  | 4.9975978  | 11.8244853 |
| C | -0.1890558 | -0.3028732 | 14.9110897 |
| H | -0.8773667 | -0.9872557 | 14.4110496 |
| C | 0.2198540  | -0.5160514 | 16.1981676 |
| H | -0.1460374 | -1.3866080 | 16.7500841 |
| C | 2.4820072  | 2.4009654  | 16.8416029 |
| H | 2.8605607  | 3.3003030  | 16.3544382 |
| C | 1.5170697  | 0.1531166  | 18.2000571 |
| H | 1.1263285  | -0.7269400 | 18.7186467 |
| C | 2.3802028  | 1.0214512  | 18.8444480 |
| H | 2.6835455  | 0.8384065  | 19.8782439 |
| C | 4.2702256  | 4.0400804  | 8.7925157  |
| H | 4.9408838  | 3.1905143  | 9.0354396  |
| H | 3.4581771  | 3.6416538  | 8.1498632  |
| C | 2.8602986  | 2.1551103  | 18.1522634 |
| H | 3.5338067  | 2.8537574  | 18.6560815 |
| O | -0.1902210 | 4.0173296  | 10.8582303 |
| O | -5.3498185 | -0.0624068 | 15.6858335 |
| H | -5.7295643 | 0.3065195  | 16.5001442 |
| N | -1.7470957 | 1.8303848  | 11.0124663 |

|   |            |            |            |
|---|------------|------------|------------|
| C | -3.2623440 | 1.4476508  | 12.9406905 |
| H | -2.4834184 | 1.8960306  | 13.5793451 |
| H | -3.9362473 | 2.2676655  | 12.6325104 |
| C | -2.1252851 | 2.2212012  | 9.8315378  |
| H | -3.0146340 | 1.7295000  | 9.4213646  |
| C | -1.9467572 | 3.4554095  | 7.6579756  |
| C | -4.0381218 | 0.4004094  | 13.7412013 |
| H | -3.3669425 | -0.4331880 | 14.0173465 |
| H | -4.8485455 | -0.0328837 | 13.1264388 |
| C | -1.5356560 | 3.2535785  | 9.0324509  |
| C | -0.6221092 | 4.1481814  | 9.6433647  |
| C | -1.4536135 | 4.5944195  | 6.9441067  |
| C | -2.5976425 | 0.8510724  | 11.6971957 |
| H | -3.3704544 | 0.4893968  | 10.9972873 |
| H | -1.9730149 | -0.0014961 | 11.9929661 |
| C | -0.1650794 | 5.2907115  | 8.8999796  |
| H | 0.5171228  | 5.9792740  | 9.4026163  |
| C | -0.5642246 | 5.4972546  | 7.6087075  |
| H | -0.1965393 | 6.3666641  | 7.0561885  |
| C | -2.8122209 | 2.5705601  | 6.9595506  |
| H | -3.1920352 | 1.6723211  | 7.4478086  |

|   |            |           |            |
|---|------------|-----------|------------|
| C | -1.8424729 | 4.8151075 | 5.5989074  |
| H | -1.4500762 | 5.6939796 | 5.0795634  |
| C | -2.6974489 | 3.9411291 | 4.9512764  |
| H | -2.9924236 | 4.1183655 | 3.9140518  |
| C | -4.6442884 | 0.9708672 | 15.0148371 |
| H | -5.3205699 | 1.8131750 | 14.7625247 |
| H | -3.8372640 | 1.3809656 | 15.6565002 |
| C | -3.1800080 | 2.8091665 | 5.6445784  |
| H | -3.8469351 | 2.1060688 | 5.1382044  |

**Table S10** geometry optimized coordinates of complex **1**- hydride.

total energy = -3079.81651912751 Hartree

70

|    |           |            |            |
|----|-----------|------------|------------|
| Ni | 0.1281212 | 1.6906863  | 11.0899346 |
| O  | 0.2440406 | 0.0328020  | 12.1607019 |
| O  | 5.8170364 | 5.2031510  | 8.5006166  |
| N  | 1.5683283 | 2.4645438  | 12.0848730 |
| C  | 3.4882352 | 3.2393094  | 10.7134221 |
| C  | 1.9655396 | 2.0493760  | 13.2543230 |
| C  | 2.0507501 | 0.6589466  | 15.3226817 |
| C  | 4.0977977 | 4.4291359  | 9.9713255  |
| C  | 1.5612350 | 0.8799794  | 13.9719368 |
| C  | 0.7597647 | -0.1130363 | 13.3319337 |
| C  | 1.7720478 | -0.5859449 | 15.9718513 |
| C  | 2.2485265 | 3.6373375  | 11.5200452 |
| C  | 0.5203910 | -1.3556628 | 14.0210545 |
| C  | 1.0043294 | -1.5760101 | 15.2785635 |
| C  | 2.7937106 | 1.6212486  | 16.0585970 |
| C  | 2.2459079 | -0.8299883 | 17.2846173 |
| C  | 2.9801440 | 0.1235811  | 17.9675820 |
| C  | 5.3181879 | 4.0425484  | 9.1487250  |



|   |            |            |            |
|---|------------|------------|------------|
| C | 3.2492148  | 1.3595315  | 17.3417823 |
| O | 0.8415700  | 2.3300392  | 9.3496838  |
| O | -4.9848889 | -0.2535563 | 15.2038851 |
| N | -1.5032624 | 1.1240193  | 10.2525524 |
| C | -2.9084583 | 0.9695007  | 12.3115914 |
| C | -1.8968535 | 1.4963518  | 9.0673885  |
| C | -1.8712761 | 2.6585825  | 6.8624121  |
| C | -3.7449613 | 0.0282364  | 13.1797019 |
| C | -1.1954627 | 2.2738515  | 8.0915468  |
| C | 0.1831504  | 2.5980603  | 8.2787576  |
| C | -1.1255646 | 3.3088535  | 5.8272381  |
| C | -2.3964084 | 0.2759037  | 11.0472787 |
| C | 0.8919293  | 3.2439995  | 7.2011647  |
| C | 0.2655625  | 3.5786326  | 6.0356391  |
| C | -3.2543713 | 2.4374263  | 6.6195569  |
| C | -1.7577318 | 3.6850396  | 4.6164803  |
| C | -3.1034761 | 3.4400797  | 4.4068542  |
| C | -4.2329788 | 0.6925857  | 14.4587544 |
| C | -3.8516207 | 2.8126695  | 5.4256481  |
| H | 6.5930643  | 4.9492850  | 7.9744671  |
| H | 3.1928475  | 2.4634264  | 9.9909168  |

|   |            |            |            |
|---|------------|------------|------------|
| H | 4.2353681  | 2.7931192  | 11.3956903 |
| H | 2.7410309  | 2.6643856  | 13.7266601 |
| H | 3.3442871  | 4.8722175  | 9.2938258  |
| H | 4.3892233  | 5.2220916  | 10.6844252 |
| H | 2.5319506  | 4.3234877  | 12.3374010 |
| H | 1.5400667  | 4.1588510  | 10.8644992 |
| H | -0.0744644 | -2.1068913 | 13.4969909 |
| H | 0.8010926  | -2.5236242 | 15.7859642 |
| H | 3.0083119  | 2.5998611  | 15.6288283 |
| H | 2.0168682  | -1.7921583 | 17.7514556 |
| H | 3.3413242  | -0.0724423 | 18.9801605 |
| H | 6.0887262  | 3.5963370  | 9.8106199  |
| H | 5.0354844  | 3.2657795  | 8.4087947  |
| H | 3.8176102  | 2.1265317  | 17.8748082 |
| H | -5.2972929 | 0.1768061  | 16.0167078 |
| H | -2.0473237 | 1.3364313  | 12.8947305 |
| H | -3.5022991 | 1.8562137  | 12.0240940 |
| H | -2.8847046 | 1.1273324  | 8.7707724  |
| H | -3.1453206 | -0.8596389 | 13.4533277 |
| H | -4.6216018 | -0.3405496 | 12.6159248 |
| H | -3.2490754 | -0.0353731 | 10.4192391 |

|   |            |            |            |
|---|------------|------------|------------|
| H | -1.8339281 | -0.6236469 | 11.3358871 |
| H | 1.9503502  | 3.4592591  | 7.3646476  |
| H | 0.8239502  | 4.0730603  | 5.2353004  |
| H | -3.8833917 | 1.9767863  | 7.3817540  |
| H | -1.1575329 | 4.1780878  | 3.8466010  |
| H | -3.5838043 | 3.7339390  | 3.4703189  |
| H | -4.8496785 | 1.5796232  | 14.2069540 |
| H | -3.3626742 | 1.0558954  | 15.0435131 |
| H | -4.9187155 | 2.6244164  | 5.2791068  |
| H | -0.6475886 | 2.8274268  | 11.5657552 |

**Table S11** geometry optimized coordinates of complex **2**.

total energy = -3157.79871580081 Hartree

75

|    |            |            |            |
|----|------------|------------|------------|
| Ni | 0.8165806  | 8.8677585  | 8.4053141  |
| O  | -0.6261819 | 8.0654392  | 7.5644028  |
| O  | 3.9575507  | 14.4013472 | 9.6922124  |
| H  | 3.3750181  | 13.9255175 | 10.3085343 |
| N  | 1.5671993  | 9.3522104  | 6.7024184  |
| C  | 0.3201433  | 7.7043135  | 5.3950781  |
| C  | -0.6478166 | 7.4833127  | 6.4059200  |
| C  | 1.7846953  | 11.7956486 | 7.0589440  |
| H  | 1.1844043  | 11.5898029 | 7.9603744  |
| H  | 1.0735334  | 12.1067945 | 6.2722161  |
| C  | 1.2882772  | 8.7443893  | 5.5892295  |
| H  | 1.8196674  | 9.0965738  | 4.6974360  |
| C  | 0.2461423  | 6.9854099  | 4.1402257  |
| C  | 2.7761308  | 12.9175212 | 7.3761056  |
| H  | 3.5618690  | 12.5179079 | 8.0382189  |
| H  | 3.2876099  | 13.2547828 | 6.4550861  |
| C  | 2.4817093  | 10.4963172 | 6.6410980  |
| H  | 2.8882770  | 10.5861352 | 5.6193489  |

|   |            |            |           |
|---|------------|------------|-----------|
| H | 3.3145678  | 10.3017683 | 7.3290134 |
| C | -1.7474844 | 6.5979168  | 6.1284864 |
| H | -2.5072563 | 6.4785002  | 6.9019343 |
| C | 2.1284634  | 14.1152904 | 8.0788642 |
| H | 1.4983226  | 14.6911025 | 7.3765771 |
| H | 1.4467828  | 13.7483516 | 8.8719810 |
| C | -0.8485170 | 6.0915531  | 3.9124734 |
| C | 3.1422220  | 15.0571279 | 8.7260253 |
| H | 3.8371380  | 15.4582609 | 7.9684167 |
| H | 2.6133216  | 15.9190709 | 9.1800116 |
| C | -1.8376929 | 5.9361099  | 4.9341684 |
| H | -2.6830964 | 5.2686048  | 4.7423357 |
| C | 1.2168509  | 7.1073761  | 3.1098289 |
| H | 2.0861108  | 7.7515533  | 3.2473274 |
| C | -0.9449589 | 5.3799535  | 2.6903117 |
| H | -1.7930957 | 4.7052226  | 2.5434014 |
| C | 0.0104379  | 5.5309170  | 1.7013697 |
| H | -0.0704048 | 4.9789791  | 0.7617002 |
| C | 1.0995546  | 6.4029450  | 1.9220645 |
| H | 1.8656946  | 6.5208251  | 1.1509653 |
| O | 2.2607900  | 9.6669095  | 9.2471505 |

|   |            |            |            |
|---|------------|------------|------------|
| O | -2.3276432 | 3.3428523  | 7.1219887  |
| H | -1.7426285 | 3.8178951  | 6.5074202  |
| N | 0.0640011  | 8.3870712  | 10.1086916 |
| C | 1.3077396  | 10.0410965 | 11.4111980 |
| C | 2.2800765  | 10.2544759 | 10.4029253 |
| C | -0.1548395 | 5.9426890  | 9.7581463  |
| H | 0.4462980  | 6.1463486  | 8.8567940  |
| H | 0.5552735  | 5.6322673  | 10.5460798 |
| C | 0.3393333  | 9.0007531  | 11.2195345 |
| H | -0.1946347 | 8.6532594  | 12.1116694 |
| C | 1.3778529  | 10.7672424 | 12.6619822 |
| C | -1.1474097 | 4.8214778  | 9.4419986  |
| H | -1.9328799 | 5.2215780  | 8.7798522  |
| H | -1.6591304 | 4.4853220  | 10.3632832 |
| C | -0.8509947 | 7.2435423  | 10.1726485 |
| H | -1.2580540 | 7.1566614  | 11.1944571 |
| H | -1.6834743 | 7.4366736  | 9.4838912  |
| C | 3.3817890  | 11.1371767 | 10.6808092 |
| H | 4.1454285  | 11.2497204 | 9.9101188  |
| C | -0.5013817 | 3.6225375  | 8.7396374  |
| H | 0.1258411  | 3.0444705  | 9.4426756  |

|   |            |            |            |
|---|------------|------------|------------|
| H | 0.1828773  | 3.9882668  | 7.9481663  |
| C | 2.4743138  | 11.6588562 | 12.8898105 |
| C | -1.5163759 | 2.6840408  | 8.0895102  |
| H | -2.2142694 | 2.2844317  | 8.8451913  |
| H | -0.9889853 | 1.8208115  | 7.6362101  |
| C | 3.4689421  | 11.8049573 | 11.8720339 |
| H | 4.3160820  | 12.4701208 | 12.0643556 |
| C | 0.4014309  | 10.6547406 | 13.6880337 |
| H | -0.4692802 | 10.0126243 | 13.5498467 |
| C | 2.5668976  | 12.3775367 | 14.1081267 |
| H | 3.4165692  | 13.0502694 | 14.2553867 |
| C | 1.6058299  | 12.2358830 | 15.0929524 |
| H | 1.6836183  | 12.7933825 | 16.0295929 |
| C | 0.5148490  | 11.3662464 | 14.8719419 |
| H | -0.2557749 | 11.2558903 | 15.6396778 |

**Table S12** geometry optimized coordinates of complex **2**-hydride.

total energy = -3158.33873725985 Hartree

76

|    |            |            |            |
|----|------------|------------|------------|
| Ni | 0.7532230  | 8.8267596  | 8.0910436  |
| O  | 0.6791842  | 6.9723589  | 7.3820444  |
| O  | 3.5963649  | 14.0832388 | 10.5173322 |
| N  | 1.4701748  | 9.4805888  | 6.4491180  |
| C  | 0.7387869  | 7.6103998  | 5.0571563  |
| C  | 0.4596802  | 6.7130405  | 6.1371227  |
| C  | 1.4362199  | 11.7148261 | 7.4992525  |
| C  | 1.3537114  | 8.8856830  | 5.3042231  |
| C  | 0.4699259  | 7.2048117  | 3.6883084  |
| C  | 2.3107578  | 12.8094928 | 8.1126667  |
| C  | 2.1992452  | 10.7399048 | 6.5930959  |
| C  | -0.0761303 | 5.4111211  | 5.8232242  |
| C  | 1.5723421  | 13.6026693 | 9.1951707  |
| C  | -0.0507582 | 5.8960036  | 3.4304035  |
| C  | 2.4404384  | 14.6407033 | 9.9040768  |
| C  | -0.3139525 | 5.0257230  | 4.5352174  |
| C  | 0.6819511  | 8.0478880  | 2.5625790  |
| C  | -0.3141305 | 5.4774658  | 2.1024419  |



C -0.0782104 6.3173138 1.0285755  
C 0.4225210 7.6146328 1.2714936  
O 2.5169192 8.9357453 8.9933134  
O -1.8627914 2.8388474 7.7155685  
N -0.1050914 8.6042589 9.7924357  
C 1.5661338 9.9664550 10.9454555  
C 2.6442809 9.6440927 10.0650688  
C -0.7172046 6.2388836 10.1341287  
C 0.3292120 9.2414734 10.8370112  
C 1.7721531 10.8874388 12.0403784  
C -1.7222363 5.1753916 9.6907778  
C -1.2264016 7.6737907 9.9214639  
C 3.9608607 10.1236931 10.4033302  
C -1.2066157 3.7484214 9.9065665  
C 3.0869320 11.3901029 12.3000295  
C -1.9902228 2.6930798 9.1282919  
C 4.1680522 10.9558915 11.4661257  
C 0.7146663 11.3593357 12.8625032  
C 3.2995269 12.3108233 13.3580241  
C 2.2479540 12.7450677 14.1469745  
C 0.9469066 12.2609561 13.8899226

|   |            |            |            |
|---|------------|------------|------------|
| H | 3.3133477  | 13.3981867 | 11.1467431 |
| H | 0.9854255  | 11.1442114 | 8.3352521  |
| H | 0.5849977  | 12.1509883 | 6.9481184  |
| H | 1.7933811  | 9.4094989  | 4.4464955  |
| H | 3.2060301  | 12.3494724 | 8.5644758  |
| H | 2.6719444  | 13.4957839 | 7.3237616  |
| H | 2.3932555  | 11.1799642 | 5.5996761  |
| H | 3.1718150  | 10.5061919 | 7.0575725  |
| H | -0.3037184 | 4.7512827  | 6.6622307  |
| H | 0.6954028  | 14.1183839 | 8.7620200  |
| H | 1.1749156  | 12.8980875 | 9.9511310  |
| H | 2.8138460  | 15.3837084 | 9.1785787  |
| H | 1.8274747  | 15.1882700 | 10.6482610 |
| H | -0.7280429 | 4.0342019  | 4.3291163  |
| H | 1.0451265  | 9.0672277  | 2.6958295  |
| H | -0.7120417 | 4.4712902  | 1.9427948  |
| H | -0.2830761 | 5.9870561  | 0.0072758  |
| H | 0.6025050  | 8.2936367  | 0.4335085  |
| H | -0.9450574 | 2.6319834  | 7.4722034  |
| H | 0.1991024  | 6.1133859  | 9.5385404  |
| H | -0.4432129 | 6.1027951  | 11.1967958 |

|   |            |            |            |
|---|------------|------------|------------|
| H | -0.2842889 | 9.1632588  | 11.7459248 |
| H | -1.9315576 | 5.3211595  | 8.6162346  |
| H | -2.6858145 | 5.3035271  | 10.2200966 |
| H | -1.8768772 | 7.9871870  | 10.7573649 |
| H | -1.8123113 | 7.7235252  | 8.9926700  |
| H | 4.7818135  | 9.8154494  | 9.7525964  |
| H | -1.2297513 | 3.4920554  | 10.9818589 |
| H | -0.1446465 | 3.6852316  | 9.5977969  |
| H | -3.0687716 | 2.7843768  | 9.3427920  |
| H | -1.6749177 | 1.6791544  | 9.4421959  |
| H | 5.1738689  | 11.3272826 | 11.6813081 |
| H | -0.3099506 | 11.0356351 | 12.6731239 |
| H | 4.3136831  | 12.6789218 | 13.5364808 |
| H | 2.4200755  | 13.4589244 | 14.9559115 |
| H | 0.1082855  | 12.6085043 | 14.4990758 |
| H | -0.5539050 | 9.1265765  | 7.5207964  |

**Table S13** geometry optimized coordinates of complex **3**.

total energy = -3236.30986835935 Hartree

81

Ni 2.9592812 9.3157424 8.5153814

O 1.3247962 9.1326881 7.6754186

N 2.7242049 11.2208208 8.6360988

O 3.9847335 10.8407220 16.2812925

H 3.6563115 10.6394550 17.1730610

C 1.9030749 11.8978500 7.8891336

H 1.8960805 12.9834137 8.0408531

C -1.0287187 10.3171287 5.2375378

H -1.8093566 9.9131540 4.5866762

C -0.7597998 11.7216992 5.1862438

C 3.4347912 11.9236195 13.5725719

H 2.3837252 12.2392407 13.7196528

H 3.4513815 10.8275594 13.7058054

C 4.3095063 12.5697393 14.6508154

H 5.3596929 12.2468728 14.5197787

H 4.2991459 13.6691036 14.5339574

C 3.8748581 12.2424927 16.0724021

H 4.5108575 12.7971612 16.7918213

|   |            |            |            |
|---|------------|------------|------------|
| H | 2.8298049  | 12.5813921 | 16.2286792 |
| C | 0.5038797  | 13.6621197 | 5.9469678  |
| H | 1.2842356  | 14.1223671 | 6.5536901  |
| C | 3.0114155  | 11.6105437 | 11.0722512 |
| H | 1.9542007  | 11.9096270 | 11.1969481 |
| H | 3.0492374  | 10.5152278 | 11.1958646 |
| C | 0.9803186  | 11.3785599 | 6.9242887  |
| C | 3.4685404  | 11.9687424 | 9.6553762  |
| H | 3.3317216  | 13.0500969 | 9.4822637  |
| H | 4.5345288  | 11.7336726 | 9.5457797  |
| C | 0.7077924  | 9.9879608  | 6.9222526  |
| C | 3.8750722  | 12.2727634 | 12.1482682 |
| H | 3.8557125  | 13.3715267 | 12.0162089 |
| H | 4.9282485  | 11.9643527 | 12.0071465 |
| C | 0.2562242  | 12.2654560 | 6.0361109  |
| C | -0.3328342 | 9.4835271  | 6.0681137  |
| H | -0.5383501 | 8.4119887  | 6.1034449  |
| C | -1.4829299 | 12.5682457 | 4.3087999  |
| H | -2.2528687 | 12.1240886 | 3.6715635  |
| C | -0.2195838 | 14.4701041 | 5.0838148  |
| H | -0.0019511 | 15.5408510 | 5.0427585  |

|   |            |            |            |
|---|------------|------------|------------|
| C | -1.2251597 | 13.9264048 | 4.2543012  |
| H | -1.7875628 | 14.5720699 | 3.5752865  |
| O | 4.5952881  | 9.4968729  | 9.3536084  |
| N | 3.1936623  | 7.4101027  | 8.3966962  |
| O | 1.9643932  | 7.8021848  | 0.7477133  |
| H | 2.2917286  | 8.0048260  | -0.1441435 |
| C | 4.0077409  | 6.7333827  | 9.1513965  |
| H | 4.0145398  | 5.6474052  | 9.0023253  |
| C | 6.9283296  | 8.3162785  | 11.8134676 |
| H | 7.7071386  | 8.7204933  | 12.4663666 |
| C | 6.6515677  | 6.9135758  | 11.8725175 |
| C | 2.5049619  | 6.7141959  | 3.4560959  |
| H | 3.5565087  | 6.3984743  | 3.3127519  |
| H | 2.4892834  | 7.8104473  | 3.3242568  |
| C | 1.6343466  | 6.0698011  | 2.3734924  |
| H | 0.5835761  | 6.3920099  | 2.5014344  |
| H | 1.6447021  | 4.9702262  | 2.4883314  |
| C | 2.0737850  | 6.3999640  | 0.9540455  |
| H | 1.4402241  | 5.8467364  | 0.2314159  |
| H | 3.1194258  | 6.0615234  | 0.8005499  |
| C | 5.3818978  | 4.9749909  | 11.1166597 |

|   |           |            |            |
|---|-----------|------------|------------|
| H | 4.6024503 | 4.5153332  | 10.5082861 |
| C | 2.9180311 | 7.0237275  | 5.9586936  |
| H | 3.9759164 | 6.7256567  | 5.8373972  |
| H | 2.8797802 | 8.1192907  | 5.8372924  |
| C | 4.9244832 | 7.2543113  | 10.1212711 |
| C | 2.4555914 | 6.6622298  | 7.3729896  |
| H | 2.5937717 | 5.5808702  | 7.5450444  |
| H | 1.3886044 | 6.8949924  | 7.4781434  |
| C | 5.2036429 | 8.6435926  | 10.1162528 |
| C | 2.0588140 | 6.3631776  | 4.8781098  |
| H | 2.0774855 | 5.2642166  | 5.0086571  |
| H | 1.0051004 | 6.6715566  | 5.0154659  |
| C | 5.6380296 | 6.3696205  | 11.0198360 |
| C | 6.2419920 | 9.1480506  | 10.9730785 |
| H | 6.4536428 | 10.2181570 | 10.9318987 |
| C | 7.3644715 | 6.0688935  | 12.7600908 |
| H | 8.1327611 | 6.5130108  | 13.3993461 |
| C | 6.0954950 | 4.1688056  | 11.9896368 |
| H | 5.8716357 | 3.0995843  | 12.0365638 |
| C | 7.0989289 | 4.7125351  | 12.8217759 |
| H | 7.6534789 | 4.0683230  | 13.5085891 |

**Table S14** geometry optimized coordinates of complex **3**-hydride.

total energy = -3236.84578928266 Hartree

82

Ni 3.0622614 9.7162009 8.3876950

O 2.3679192 9.8195747 6.5258323

N 2.7673679 11.5954709 8.6359946

O 3.8168998 10.2368398 16.2183368

C 1.9910885 12.3258060 7.8873266

C 0.1584712 11.3631719 4.1563785

C -0.1884138 12.5969422 4.7955918

C 3.1816825 11.6276878 13.6692865

C 3.9199207 12.2190897 14.8738101

C 3.4961166 11.6219484 16.2081003

C -0.0120744 14.1269594 6.6791138

C 2.8951891 11.6315921 11.1301208

C 1.3079112 11.9620572 6.6827555

C 3.3943116 12.2150291 9.8062342

C 1.5946970 10.7214263 6.0347284

C 3.6378207 12.2185410 12.3327095

C 0.3825069 12.9031928 6.0727640

C 1.0058469 10.4678070 4.7423108

C -1.0890337 13.4994061 4.1777881



C -0.8934093 14.9962308 6.0543007  
C -1.4404174 14.6896330 4.7900362  
O 4.8572508 9.8076507 9.2047799  
N 3.1312135 7.8054394 8.3758186  
O 2.2790060 5.9751695 0.8775138  
C 3.9408306 7.0908431 9.1043060  
C 7.3400660 8.3504171 11.3496517  
C 6.9065608 6.9907768 11.4657031  
C 2.2906214 5.7692607 3.8404887  
C 1.2409782 5.1860958 2.8900657  
C 1.7922707 4.8059991 1.5234508  
C 5.3323456 5.2173170 10.9177523  
C 2.7691190 6.7307708 6.1602015  
C 5.0259075 7.5303125 9.9273789  
C 2.1740347 7.0836574 7.5264932  
C 5.4645121 8.8874307 9.8723027  
C 1.7217080 6.1444504 5.2113323  
C 5.7367331 6.5701309 10.7555252  
C 6.6575995 9.2569506 10.5901579  
C 7.6205383 6.0734109 12.2759612  
C 6.0485316 4.3366064 11.7139353

|   |            |            |            |
|---|------------|------------|------------|
| C | 7.2061209  | 4.7592483  | 12.4018943 |
| H | 3.4927790  | 9.8549898  | 17.0504889 |
| H | 1.8815653  | 13.3674472 | 8.2101372  |
| H | -0.2815648 | 11.1427467 | 3.1792879  |
| H | 2.0940768  | 11.7938148 | 13.7931421 |
| H | 3.3294183  | 10.5331767 | 13.6583774 |
| H | 5.0095420  | 12.0691272 | 14.7524101 |
| H | 3.7535552  | 13.3112691 | 14.9169512 |
| H | 4.0156910  | 12.1503630 | 17.0330523 |
| H | 2.4067947  | 11.7739726 | 16.3548233 |
| H | 0.3630001  | 14.4017008 | 7.6651573  |
| H | 1.8095084  | 11.8174406 | 11.2236931 |
| H | 3.0315373  | 10.5365363 | 11.1183690 |
| H | 3.2050904  | 13.3023714 | 9.7807864  |
| H | 4.4789694  | 12.0520867 | 9.7296025  |
| H | 3.5048336  | 13.3172469 | 12.3515065 |
| H | 4.7229988  | 12.0408734 | 12.2078489 |
| H | 1.2624433  | 9.5220629  | 4.2592609  |
| H | -1.5054058 | 13.2336374 | 3.2019749  |
| H | -1.1712893 | 15.9276665 | 6.5552435  |
| H | -2.1364942 | 15.3801130 | 4.3074671  |

|   |           |            |            |
|---|-----------|------------|------------|
| H | 2.6738894 | 5.7124429  | 0.0299080  |
| H | 3.7831206 | 6.0070205  | 9.0467920  |
| H | 8.2367023 | 8.6576546  | 11.8958521 |
| H | 3.1089005 | 5.0352064  | 3.9715932  |
| H | 2.7448114 | 6.6601676  | 3.3717334  |
| H | 0.4214974 | 5.9157900  | 2.7482610  |
| H | 0.7876032 | 4.2838162  | 3.3402683  |
| H | 0.9931981 | 4.3288588  | 0.9205028  |
| H | 2.6032686 | 4.0583924  | 1.6451113  |
| H | 4.4337134 | 4.8463401  | 10.4247839 |
| H | 3.5974127 | 6.0114656  | 6.3005504  |
| H | 3.1952905 | 7.6459271  | 5.7206348  |
| H | 1.8485448 | 6.1647515  | 8.0459273  |
| H | 1.2951869 | 7.7251758  | 7.3855678  |
| H | 1.2584515 | 5.2514480  | 5.6733957  |
| H | 0.9058014 | 6.8803742  | 5.0780868  |
| H | 6.9824847 | 10.2965212 | 10.5099729 |
| H | 8.5101546 | 6.4273277  | 12.8045136 |
| H | 5.7044321 | 3.3034739  | 11.8125004 |
| H | 7.7616454 | 4.0581465  | 13.0295713 |
| H | 1.8295050 | 9.5477962  | 9.1443270  |

**Table S15** Summary of Natural Population Analysis for complex **1**.

## Natural Population

| Natural ----- |          |          |         |         |          |
|---------------|----------|----------|---------|---------|----------|
| Atom No       | Charge   | Core     | Valence | Rydberg | Total    |
| -----         |          |          |         |         |          |
| 1 ni          | 0.96584  | 17.99557 | 9.00160 | 0.03699 | 27.03416 |
| 2 o           | -0.73757 | 1.99971  | 6.72504 | 0.01282 | 8.73757  |
| 3 o           | -0.77419 | 1.99978  | 6.76384 | 0.01057 | 8.77419  |
| 4 h           | 0.46969  | 0.00000  | 0.52874 | 0.00157 | 0.53031  |
| 5 n           | -0.55602 | 1.99920  | 5.53384 | 0.02297 | 7.55602  |
| 6 c           | -0.42321 | 1.99912  | 4.40941 | 0.01468 | 6.42321  |
| 7 h           | 0.21476  | 0.00000  | 0.78132 | 0.00393 | 0.78524  |
| 8 h           | 0.21218  | 0.00000  | 0.78463 | 0.00319 | 0.78782  |
| 9 c           | 0.17229  | 1.99906  | 3.80414 | 0.02451 | 5.82771  |
| 10 h          | 0.20359  | 0.00000  | 0.79414 | 0.00227 | 0.79641  |
| 11 c          | -0.02615 | 1.99888  | 4.01154 | 0.01573 | 6.02615  |
| 12 c          | -0.43647 | 1.99914  | 4.42270 | 0.01463 | 6.43647  |
| 13 h          | 0.20740  | 0.00000  | 0.78829 | 0.00431 | 0.79260  |
| 14 h          | 0.21062  | 0.00000  | 0.78526 | 0.00412 | 0.78938  |
| 15 c          | -0.21652 | 1.99882  | 4.20069 | 0.01701 | 6.21652  |
| 16 c          | 0.43659  | 1.99877  | 3.53154 | 0.03311 | 5.56341  |

|      |          |         |         |         |         |
|------|----------|---------|---------|---------|---------|
| 17 c | -0.09750 | 1.99884 | 4.08294 | 0.01571 | 6.09750 |
| 18 c | -0.19353 | 1.99911 | 4.17537 | 0.01906 | 6.19353 |
| 19 h | 0.20440  | 0.00000 | 0.79308 | 0.00252 | 0.79560 |
| 20 h | 0.22958  | 0.00000 | 0.76666 | 0.00376 | 0.77042 |
| 21 c | -0.26538 | 1.99890 | 4.24854 | 0.01794 | 6.26538 |
| 22 h | 0.23160  | 0.00000 | 0.76606 | 0.00234 | 0.76840 |
| 23 c | -0.15819 | 1.99893 | 4.14273 | 0.01653 | 6.15819 |
| 24 h | 0.23213  | 0.00000 | 0.76590 | 0.00197 | 0.76787 |
| 25 c | -0.22303 | 1.99894 | 4.20850 | 0.01559 | 6.22303 |
| 26 h | 0.22399  | 0.00000 | 0.77396 | 0.00205 | 0.77601 |
| 27 c | -0.18760 | 1.99893 | 4.17194 | 0.01673 | 6.18760 |
| 28 h | 0.22761  | 0.00000 | 0.77048 | 0.00191 | 0.77239 |
| 29 c | -0.24139 | 1.99894 | 4.22584 | 0.01662 | 6.24139 |
| 30 h | 0.22910  | 0.00000 | 0.76923 | 0.00167 | 0.77090 |
| 31 c | -0.01634 | 1.99914 | 3.99987 | 0.01733 | 6.01634 |
| 32 h | 0.17156  | 0.00000 | 0.82568 | 0.00276 | 0.82844 |
| 33 h | 0.17131  | 0.00000 | 0.82585 | 0.00284 | 0.82869 |
| 34 c | -0.20715 | 1.99895 | 4.19169 | 0.01651 | 6.20715 |
| 35 h | 0.22884  | 0.00000 | 0.76945 | 0.00171 | 0.77116 |
| 36 o | -0.73757 | 1.99971 | 6.72507 | 0.01280 | 8.73757 |
| 37 o | -0.77422 | 1.99978 | 6.76388 | 0.01057 | 8.77422 |

|      |          |         |         |         |         |
|------|----------|---------|---------|---------|---------|
| 38 h | 0.46972  | 0.00000 | 0.52872 | 0.00157 | 0.53028 |
| 39 n | -0.55578 | 1.99920 | 5.53361 | 0.02297 | 7.55578 |
| 40 c | -0.42319 | 1.99912 | 4.40940 | 0.01467 | 6.42319 |
| 41 h | 0.21480  | 0.00000 | 0.78126 | 0.00393 | 0.78520 |
| 42 h | 0.21213  | 0.00000 | 0.78467 | 0.00320 | 0.78787 |
| 43 c | 0.17240  | 1.99906 | 3.80404 | 0.02450 | 5.82760 |
| 44 h | 0.20365  | 0.00000 | 0.79408 | 0.00227 | 0.79635 |
| 45 c | -0.02617 | 1.99888 | 4.01156 | 0.01573 | 6.02617 |
| 46 c | -0.43648 | 1.99914 | 4.42271 | 0.01464 | 6.43648 |
| 47 h | 0.20741  | 0.00000 | 0.78826 | 0.00432 | 0.79259 |
| 48 h | 0.21059  | 0.00000 | 0.78529 | 0.00412 | 0.78941 |
| 49 c | -0.21643 | 1.99882 | 4.20060 | 0.01702 | 6.21643 |
| 50 c | 0.43627  | 1.99877 | 3.53185 | 0.03312 | 5.56373 |
| 51 c | -0.09746 | 1.99884 | 4.08291 | 0.01571 | 6.09746 |
| 52 c | -0.19348 | 1.99911 | 4.17532 | 0.01905 | 6.19348 |
| 53 h | 0.20442  | 0.00000 | 0.79306 | 0.00252 | 0.79558 |
| 54 h | 0.22947  | 0.00000 | 0.76676 | 0.00377 | 0.77053 |
| 55 c | -0.26553 | 1.99890 | 4.24867 | 0.01796 | 6.26553 |
| 56 h | 0.23157  | 0.00000 | 0.76608 | 0.00234 | 0.76843 |
| 57 c | -0.15805 | 1.99893 | 4.14259 | 0.01653 | 6.15805 |
| 58 h | 0.23213  | 0.00000 | 0.76590 | 0.00197 | 0.76787 |

|      |          |         |         |         |         |
|------|----------|---------|---------|---------|---------|
| 59 c | -0.22305 | 1.99894 | 4.20851 | 0.01559 | 6.22305 |
| 60 h | 0.22401  | 0.00000 | 0.77394 | 0.00205 | 0.77599 |
| 61 c | -0.18759 | 1.99893 | 4.17194 | 0.01673 | 6.18759 |
| 62 h | 0.22762  | 0.00000 | 0.77047 | 0.00191 | 0.77238 |
| 63 c | -0.24140 | 1.99894 | 4.22585 | 0.01662 | 6.24140 |
| 64 h | 0.22910  | 0.00000 | 0.76923 | 0.00167 | 0.77090 |
| 65 c | -0.01634 | 1.99914 | 3.99987 | 0.01732 | 6.01634 |
| 66 h | 0.17165  | 0.00000 | 0.82559 | 0.00276 | 0.82835 |
| 67 h | 0.17123  | 0.00000 | 0.82593 | 0.00284 | 0.82877 |
| 68 c | -0.20715 | 1.99895 | 4.19169 | 0.01651 | 6.20715 |
| 69 h | 0.22884  | 0.00000 | 0.76945 | 0.00171 | 0.77116 |

-----  
\* Total \*      -0.00000    89.96186    195.27925    0.75889    286.00000

**Table S16** Summary of Natural Population Analysis for complex **1**-hydride.

## Natural Population

| Natural ----- |          |          |         |         |          |
|---------------|----------|----------|---------|---------|----------|
| Atom No       | Charge   | Core     | Valence | Rydberg | Total    |
| -----         |          |          |         |         |          |
| 1 ni          | 1.06646  | 17.99438 | 8.89038 | 0.04878 | 26.93354 |
| 2 o           | -0.79076 | 1.99973  | 6.77573 | 0.01530 | 8.79076  |
| 3 o           | -0.77423 | 1.99978  | 6.76388 | 0.01057 | 8.77423  |
| 4 n           | -0.55579 | 1.99920  | 5.53234 | 0.02425 | 7.55579  |
| 5 c           | -0.42315 | 1.99912  | 4.41023 | 0.01381 | 6.42315  |
| 6 c           | 0.17486  | 1.99905  | 3.80108 | 0.02500 | 5.82514  |
| 7 c           | -0.02562 | 1.99888  | 4.01094 | 0.01580 | 6.02562  |
| 8 c           | -0.43823 | 1.99914  | 4.42428 | 0.01481 | 6.43823  |
| 9 c           | -0.21373 | 1.99882  | 4.19794 | 0.01697 | 6.21373  |
| 10 c          | 0.45208  | 1.99881  | 3.51381 | 0.03530 | 5.54792  |
| 11 c          | -0.09680 | 1.99884  | 4.08219 | 0.01577 | 6.09680  |
| 12 c          | -0.19477 | 1.99912  | 4.17623 | 0.01943 | 6.19477  |
| 13 c          | -0.26835 | 1.99890  | 4.25146 | 0.01799 | 6.26835  |
| 14 c          | -0.15674 | 1.99893  | 4.14127 | 0.01654 | 6.15674  |
| 15 c          | -0.22222 | 1.99894  | 4.20774 | 0.01554 | 6.22222  |
| 16 c          | -0.18785 | 1.99893  | 4.17215 | 0.01677 | 6.18785  |



|      |          |         |         |         |         |
|------|----------|---------|---------|---------|---------|
| 17 c | -0.23999 | 1.99894 | 4.22442 | 0.01664 | 6.23999 |
| 18 c | -0.01631 | 1.99914 | 3.99993 | 0.01724 | 6.01631 |
| 19 c | -0.20652 | 1.99895 | 4.19106 | 0.01651 | 6.20652 |
| 20 o | -0.77833 | 1.99973 | 6.76343 | 0.01517 | 8.77833 |
| 21 o | -0.77422 | 1.99978 | 6.76387 | 0.01057 | 8.77422 |
| 22 n | -0.55150 | 1.99919 | 5.52850 | 0.02380 | 7.55150 |
| 23 c | -0.42467 | 1.99912 | 4.41130 | 0.01426 | 6.42467 |
| 24 c | 0.17825  | 1.99905 | 3.79795 | 0.02474 | 5.82175 |
| 25 c | -0.02550 | 1.99889 | 4.01085 | 0.01577 | 6.02550 |
| 26 c | -0.43701 | 1.99914 | 4.42318 | 0.01468 | 6.43701 |
| 27 c | -0.21992 | 1.99883 | 4.20408 | 0.01701 | 6.21992 |
| 28 c | 0.45323  | 1.99882 | 3.51258 | 0.03537 | 5.54677 |
| 29 c | -0.09852 | 1.99884 | 4.08392 | 0.01576 | 6.09852 |
| 30 c | -0.19473 | 1.99911 | 4.17628 | 0.01935 | 6.19473 |
| 31 c | -0.26894 | 1.99890 | 4.25196 | 0.01808 | 6.26894 |
| 32 c | -0.15822 | 1.99893 | 4.14276 | 0.01654 | 6.15822 |
| 33 c | -0.22370 | 1.99894 | 4.20927 | 0.01549 | 6.22370 |
| 34 c | -0.18784 | 1.99893 | 4.17216 | 0.01676 | 6.18784 |
| 35 c | -0.24152 | 1.99894 | 4.22593 | 0.01666 | 6.24152 |
| 36 c | -0.01667 | 1.99915 | 4.00022 | 0.01730 | 6.01667 |
| 37 c | -0.20696 | 1.99895 | 4.19149 | 0.01651 | 6.20696 |

|      |         |         |         |         |         |
|------|---------|---------|---------|---------|---------|
| 38 h | 0.46969 | 0.00000 | 0.52874 | 0.00157 | 0.53031 |
| 39 h | 0.22531 | 0.00000 | 0.77027 | 0.00442 | 0.77469 |
| 40 h | 0.20860 | 0.00000 | 0.78863 | 0.00276 | 0.79140 |
| 41 h | 0.20323 | 0.00000 | 0.79435 | 0.00242 | 0.79677 |
| 42 h | 0.20769 | 0.00000 | 0.78778 | 0.00453 | 0.79231 |
| 43 h | 0.20983 | 0.00000 | 0.78601 | 0.00416 | 0.79017 |
| 44 h | 0.20882 | 0.00000 | 0.78858 | 0.00260 | 0.79118 |
| 45 h | 0.22760 | 0.00000 | 0.76956 | 0.00284 | 0.77240 |
| 46 h | 0.23237 | 0.00000 | 0.76504 | 0.00259 | 0.76763 |
| 47 h | 0.23178 | 0.00000 | 0.76620 | 0.00202 | 0.76822 |
| 48 h | 0.22306 | 0.00000 | 0.77482 | 0.00212 | 0.77694 |
| 49 h | 0.22777 | 0.00000 | 0.77032 | 0.00191 | 0.77223 |
| 50 h | 0.22924 | 0.00000 | 0.76910 | 0.00166 | 0.77076 |
| 51 h | 0.17179 | 0.00000 | 0.82547 | 0.00274 | 0.82821 |
| 52 h | 0.17092 | 0.00000 | 0.82636 | 0.00272 | 0.82908 |
| 53 h | 0.22894 | 0.00000 | 0.76935 | 0.00171 | 0.77106 |
| 54 h | 0.47003 | 0.00000 | 0.52841 | 0.00156 | 0.52997 |
| 55 h | 0.21648 | 0.00000 | 0.78016 | 0.00336 | 0.78352 |
| 56 h | 0.21358 | 0.00000 | 0.78326 | 0.00317 | 0.78642 |
| 57 h | 0.20263 | 0.00000 | 0.79503 | 0.00233 | 0.79737 |
| 58 h | 0.20933 | 0.00000 | 0.78633 | 0.00434 | 0.79067 |

|      |          |         |         |         |         |
|------|----------|---------|---------|---------|---------|
| 59 h | 0.21082  | 0.00000 | 0.78509 | 0.00410 | 0.78918 |
| 60 h | 0.20868  | 0.00000 | 0.78879 | 0.00253 | 0.79132 |
| 61 h | 0.23078  | 0.00000 | 0.76518 | 0.00405 | 0.76922 |
| 62 h | 0.22832  | 0.00000 | 0.76900 | 0.00267 | 0.77168 |
| 63 h | 0.23160  | 0.00000 | 0.76639 | 0.00201 | 0.76840 |
| 64 h | 0.22283  | 0.00000 | 0.77505 | 0.00212 | 0.77717 |
| 65 h | 0.22751  | 0.00000 | 0.77057 | 0.00192 | 0.77249 |
| 66 h | 0.22898  | 0.00000 | 0.76936 | 0.00167 | 0.77102 |
| 67 h | 0.17227  | 0.00000 | 0.82498 | 0.00275 | 0.82773 |
| 68 h | 0.17112  | 0.00000 | 0.82611 | 0.00277 | 0.82888 |
| 69 h | 0.22871  | 0.00000 | 0.76958 | 0.00172 | 0.77129 |
| 70 h | -0.05587 | 0.00000 | 1.05330 | 0.00257 | 1.05587 |

-----

\* Total \*    -0.00000    89.96081    196.25395    0.78524    287.00000

**Table S17** Summary of Natural Population Analysis for complex **2**.

## Natural Population

| Natural ----- |          |          |         |         |          |
|---------------|----------|----------|---------|---------|----------|
| Atom No       | Charge   | Core     | Valence | Rydberg | Total    |
| -----         |          |          |         |         |          |
| 1 ni          | 0.96856  | 17.99558 | 8.99989 | 0.03596 | 27.03144 |
| 2 o           | -0.73833 | 1.99971  | 6.72590 | 0.01272 | 8.73833  |
| 3 o           | -0.77415 | 1.99979  | 6.76364 | 0.01073 | 8.77415  |
| 4 h           | 0.45912  | 0.00000  | 0.53889 | 0.00199 | 0.54088  |
| 5 n           | -0.55235 | 1.99920  | 5.53011 | 0.02303 | 7.55235  |
| 6 c           | -0.21323 | 1.99882  | 4.19739 | 0.01702 | 6.21323  |
| 7 c           | 0.43505  | 1.99876  | 3.53299 | 0.03320 | 5.56495  |
| 8 c           | -0.41799 | 1.99912  | 4.40419 | 0.01468 | 6.41799  |
| 9 h           | 0.21096  | 0.00000  | 0.78528 | 0.00376 | 0.78904  |
| 10 h          | 0.21163  | 0.00000  | 0.78531 | 0.00306 | 0.78837  |
| 11 c          | 0.17278  | 1.99906  | 3.80371 | 0.02445 | 5.82722  |
| 12 h          | 0.20504  | 0.00000  | 0.79271 | 0.00225 | 0.79496  |
| 13 c          | -0.02550 | 1.99888  | 4.01085 | 0.01577 | 6.02550  |
| 14 c          | -0.41996 | 1.99913  | 4.40537 | 0.01546 | 6.41996  |
| 15 h          | 0.20739  | 0.00000  | 0.78753 | 0.00508 | 0.79261  |
| 16 h          | 0.21080  | 0.00000  | 0.78641 | 0.00279 | 0.78920  |

|      |          |         |         |         |         |
|------|----------|---------|---------|---------|---------|
| 17 c | -0.19406 | 1.99911 | 4.17587 | 0.01908 | 6.19406 |
| 18 h | 0.20533  | 0.00000 | 0.79222 | 0.00245 | 0.79467 |
| 19 h | 0.22825  | 0.00000 | 0.76817 | 0.00358 | 0.77175 |
| 20 c | -0.26885 | 1.99890 | 4.25108 | 0.01888 | 6.26885 |
| 21 h | 0.23541  | 0.00000 | 0.76200 | 0.00259 | 0.76459 |
| 22 c | -0.44439 | 1.99914 | 4.43290 | 0.01235 | 6.44439 |
| 23 h | 0.22127  | 0.00000 | 0.77601 | 0.00272 | 0.77873 |
| 24 h | 0.20283  | 0.00000 | 0.79377 | 0.00340 | 0.79717 |
| 25 c | -0.09556 | 1.99884 | 4.08084 | 0.01589 | 6.09556 |
| 26 c | -0.02363 | 1.99914 | 4.00544 | 0.01904 | 6.02363 |
| 27 h | 0.18864  | 0.00000 | 0.80896 | 0.00240 | 0.81136 |
| 28 h | 0.17868  | 0.00000 | 0.81881 | 0.00251 | 0.82132 |
| 29 c | -0.18009 | 1.99892 | 4.16421 | 0.01696 | 6.18009 |
| 30 h | 0.23414  | 0.00000 | 0.76364 | 0.00222 | 0.76586 |
| 31 c | -0.22215 | 1.99894 | 4.20754 | 0.01567 | 6.22215 |
| 32 h | 0.22445  | 0.00000 | 0.77352 | 0.00203 | 0.77555 |
| 33 c | -0.18743 | 1.99893 | 4.17178 | 0.01673 | 6.18743 |
| 34 h | 0.22830  | 0.00000 | 0.76980 | 0.00191 | 0.77170 |
| 35 c | -0.23959 | 1.99894 | 4.22403 | 0.01662 | 6.23959 |
| 36 h | 0.22948  | 0.00000 | 0.76885 | 0.00167 | 0.77052 |
| 37 c | -0.20597 | 1.99895 | 4.19053 | 0.01649 | 6.20597 |

|      |          |         |         |         |         |
|------|----------|---------|---------|---------|---------|
| 38 h | 0.22935  | 0.00000 | 0.76895 | 0.00171 | 0.77065 |
| 39 o | -0.73816 | 1.99971 | 6.72574 | 0.01271 | 8.73816 |
| 40 o | -0.77409 | 1.99979 | 6.76358 | 0.01073 | 8.77409 |
| 41 h | 0.45914  | 0.00000 | 0.53887 | 0.00200 | 0.54086 |
| 42 n | -0.55233 | 1.99920 | 5.53010 | 0.02303 | 7.55233 |
| 43 c | -0.21316 | 1.99882 | 4.19731 | 0.01703 | 6.21316 |
| 44 c | 0.43489  | 1.99876 | 3.53313 | 0.03322 | 5.56511 |
| 45 c | -0.41797 | 1.99912 | 4.40418 | 0.01467 | 6.41797 |
| 46 h | 0.21104  | 0.00000 | 0.78519 | 0.00377 | 0.78896 |
| 47 h | 0.21160  | 0.00000 | 0.78534 | 0.00306 | 0.78840 |
| 48 c | 0.17273  | 1.99906 | 3.80377 | 0.02444 | 5.82727 |
| 49 h | 0.20528  | 0.00000 | 0.79247 | 0.00224 | 0.79472 |
| 50 c | -0.02550 | 1.99888 | 4.01084 | 0.01578 | 6.02550 |
| 51 c | -0.41996 | 1.99913 | 4.40538 | 0.01545 | 6.41996 |
| 52 h | 0.20731  | 0.00000 | 0.78761 | 0.00508 | 0.79269 |
| 53 h | 0.21081  | 0.00000 | 0.78640 | 0.00279 | 0.78919 |
| 54 c | -0.19399 | 1.99911 | 4.17580 | 0.01908 | 6.19399 |
| 55 h | 0.20533  | 0.00000 | 0.79222 | 0.00245 | 0.79467 |
| 56 h | 0.22811  | 0.00000 | 0.76831 | 0.00358 | 0.77189 |
| 57 c | -0.26860 | 1.99890 | 4.25082 | 0.01889 | 6.26860 |
| 58 h | 0.23533  | 0.00000 | 0.76210 | 0.00257 | 0.76467 |

|      |          |         |         |         |         |
|------|----------|---------|---------|---------|---------|
| 59 c | -0.44444 | 1.99914 | 4.43295 | 0.01235 | 6.44444 |
| 60 h | 0.22131  | 0.00000 | 0.77597 | 0.00272 | 0.77869 |
| 61 h | 0.20286  | 0.00000 | 0.79375 | 0.00340 | 0.79714 |
| 62 c | -0.09554 | 1.99884 | 4.08082 | 0.01589 | 6.09554 |
| 63 c | -0.02364 | 1.99914 | 4.00546 | 0.01904 | 6.02364 |
| 64 h | 0.18859  | 0.00000 | 0.80901 | 0.00240 | 0.81141 |
| 65 h | 0.17868  | 0.00000 | 0.81880 | 0.00251 | 0.82132 |
| 66 c | -0.18041 | 1.99892 | 4.16450 | 0.01698 | 6.18041 |
| 67 h | 0.23414  | 0.00000 | 0.76365 | 0.00221 | 0.76586 |
| 68 c | -0.22214 | 1.99894 | 4.20753 | 0.01568 | 6.22214 |
| 69 h | 0.22448  | 0.00000 | 0.77349 | 0.00203 | 0.77552 |
| 70 c | -0.18751 | 1.99893 | 4.17185 | 0.01673 | 6.18751 |
| 71 h | 0.22828  | 0.00000 | 0.76981 | 0.00191 | 0.77172 |
| 72 c | -0.23957 | 1.99894 | 4.22401 | 0.01662 | 6.23957 |
| 73 h | 0.22949  | 0.00000 | 0.76884 | 0.00166 | 0.77051 |
| 74 c | -0.20596 | 1.99895 | 4.19051 | 0.01649 | 6.20596 |
| 75 h | 0.22935  | 0.00000 | 0.76894 | 0.00171 | 0.77065 |

-----  
\* Total \*      0.00000   93.96014   207.23812   0.80174   302.00000

**Table S18** Summary of Natural Population Analysis for complex **2**-hydride.

## Natural Population

| Natural ----- |          |          |         |         |          |
|---------------|----------|----------|---------|---------|----------|
| Atom No       | Charge   | Core     | Valence | Rydberg | Total    |
| -----         |          |          |         |         |          |
| 1 ni          | 1.08871  | 17.99447 | 8.86569 | 0.05113 | 26.91129 |
| 2 o           | -0.75088 | 1.99973  | 6.73714 | 0.01401 | 8.75088  |
| 3 o           | -0.77983 | 1.99978  | 6.76951 | 0.01055 | 8.77983  |
| 4 n           | -0.54586 | 1.99917  | 5.52233 | 0.02436 | 7.54586  |
| 5 c           | -0.22444 | 1.99883  | 4.20854 | 0.01707 | 6.22444  |
| 6 c           | 0.44421  | 1.99881  | 3.52138 | 0.03560 | 5.55579  |
| 7 c           | -0.41160 | 1.99911  | 4.39796 | 0.01453 | 6.41160  |
| 8 c           | 0.18764  | 1.99904  | 3.78899 | 0.02433 | 5.81236  |
| 9 c           | -0.02560 | 1.99888  | 4.01098 | 0.01574 | 6.02560  |
| 10 c          | -0.41798 | 1.99913  | 4.40267 | 0.01618 | 6.41798  |
| 11 c          | -0.19741 | 1.99913  | 4.17893 | 0.01936 | 6.19741  |
| 12 c          | -0.26749 | 1.99889  | 4.25035 | 0.01826 | 6.26749  |
| 13 c          | -0.44290 | 1.99913  | 4.43128 | 0.01250 | 6.44290  |
| 14 c          | -0.09877 | 1.99884  | 4.08416 | 0.01577 | 6.09877  |
| 15 c          | -0.02582 | 1.99913  | 4.00733 | 0.01936 | 6.02582  |
| 16 c          | -0.15960 | 1.99892  | 4.14414 | 0.01653 | 6.15960  |



|      |          |         |         |         |         |
|------|----------|---------|---------|---------|---------|
| 17 c | -0.22493 | 1.99894 | 4.21048 | 0.01551 | 6.22493 |
| 18 c | -0.18804 | 1.99893 | 4.17237 | 0.01675 | 6.18804 |
| 19 c | -0.24272 | 1.99894 | 4.22712 | 0.01667 | 6.24272 |
| 20 c | -0.20739 | 1.99895 | 4.19191 | 0.01653 | 6.20739 |
| 21 o | -0.78825 | 1.99974 | 6.77422 | 0.01430 | 8.78825 |
| 22 o | -0.77553 | 1.99979 | 6.76490 | 0.01085 | 8.77553 |
| 23 n | -0.56633 | 1.99920 | 5.54186 | 0.02527 | 7.56633 |
| 24 c | -0.22859 | 1.99879 | 4.21241 | 0.01739 | 6.22859 |
| 25 c | 0.43775  | 1.99880 | 3.52650 | 0.03695 | 5.56225 |
| 26 c | -0.42125 | 1.99911 | 4.40861 | 0.01353 | 6.42125 |
| 27 c | 0.17538  | 1.99904 | 3.80075 | 0.02483 | 5.82462 |
| 28 c | -0.02605 | 1.99885 | 4.01088 | 0.01631 | 6.02605 |
| 29 c | -0.41913 | 1.99914 | 4.40457 | 0.01542 | 6.41913 |
| 30 c | -0.19034 | 1.99913 | 4.17140 | 0.01981 | 6.19034 |
| 31 c | -0.26544 | 1.99887 | 4.24809 | 0.01848 | 6.26544 |
| 32 c | -0.44289 | 1.99914 | 4.43086 | 0.01289 | 6.44289 |
| 33 c | -0.12582 | 1.99884 | 4.11010 | 0.01688 | 6.12582 |
| 34 c | -0.02372 | 1.99914 | 4.00565 | 0.01893 | 6.02372 |
| 35 c | -0.16569 | 1.99892 | 4.14928 | 0.01749 | 6.16569 |
| 36 c | -0.22119 | 1.99893 | 4.20650 | 0.01576 | 6.22119 |
| 37 c | -0.20606 | 1.99892 | 4.18932 | 0.01781 | 6.20606 |

|      |          |         |         |         |         |
|------|----------|---------|---------|---------|---------|
| 38 c | -0.23576 | 1.99893 | 4.21993 | 0.01690 | 6.23576 |
| 39 c | -0.20182 | 1.99895 | 4.18635 | 0.01651 | 6.20182 |
| 40 h | 0.46667  | 0.00000 | 0.53103 | 0.00230 | 0.53333 |
| 41 h | 0.18823  | 0.00000 | 0.80746 | 0.00430 | 0.81177 |
| 42 h | 0.22268  | 0.00000 | 0.77422 | 0.00310 | 0.77732 |
| 43 h | 0.20643  | 0.00000 | 0.79135 | 0.00222 | 0.79357 |
| 44 h | 0.21195  | 0.00000 | 0.78312 | 0.00493 | 0.78805 |
| 45 h | 0.21330  | 0.00000 | 0.78389 | 0.00281 | 0.78670 |
| 46 h | 0.21718  | 0.00000 | 0.78050 | 0.00233 | 0.78282 |
| 47 h | 0.22551  | 0.00000 | 0.77086 | 0.00364 | 0.77449 |
| 48 h | 0.22388  | 0.00000 | 0.77087 | 0.00525 | 0.77612 |
| 49 h | 0.22015  | 0.00000 | 0.77703 | 0.00282 | 0.77985 |
| 50 h | 0.20310  | 0.00000 | 0.79294 | 0.00397 | 0.79690 |
| 51 h | 0.18920  | 0.00000 | 0.80845 | 0.00235 | 0.81080 |
| 52 h | 0.17804  | 0.00000 | 0.81940 | 0.00256 | 0.82196 |
| 53 h | 0.22991  | 0.00000 | 0.76795 | 0.00213 | 0.77009 |
| 54 h | 0.22274  | 0.00000 | 0.77516 | 0.00210 | 0.77726 |
| 55 h | 0.22729  | 0.00000 | 0.77079 | 0.00192 | 0.77271 |
| 56 h | 0.22873  | 0.00000 | 0.76960 | 0.00167 | 0.77127 |
| 57 h | 0.22844  | 0.00000 | 0.76984 | 0.00172 | 0.77156 |
| 58 h | 0.46486  | 0.00000 | 0.53338 | 0.00176 | 0.53514 |

|      |          |         |         |         |         |
|------|----------|---------|---------|---------|---------|
| 59 h | 0.22858  | 0.00000 | 0.76722 | 0.00420 | 0.77142 |
| 60 h | 0.20776  | 0.00000 | 0.78942 | 0.00282 | 0.79224 |
| 61 h | 0.21125  | 0.00000 | 0.78635 | 0.00240 | 0.78875 |
| 62 h | 0.20971  | 0.00000 | 0.78527 | 0.00501 | 0.79029 |
| 63 h | 0.20702  | 0.00000 | 0.79014 | 0.00284 | 0.79298 |
| 64 h | 0.21114  | 0.00000 | 0.78635 | 0.00251 | 0.78886 |
| 65 h | 0.21925  | 0.00000 | 0.77831 | 0.00244 | 0.78075 |
| 66 h | 0.23587  | 0.00000 | 0.76147 | 0.00266 | 0.76413 |
| 67 h | 0.21817  | 0.00000 | 0.77904 | 0.00278 | 0.78183 |
| 68 h | 0.20426  | 0.00000 | 0.79218 | 0.00356 | 0.79574 |
| 69 h | 0.18801  | 0.00000 | 0.80959 | 0.00241 | 0.81199 |
| 70 h | 0.18133  | 0.00000 | 0.81638 | 0.00229 | 0.81867 |
| 71 h | 0.23614  | 0.00000 | 0.76180 | 0.00206 | 0.76386 |
| 72 h | 0.22762  | 0.00000 | 0.77042 | 0.00195 | 0.77238 |
| 73 h | 0.23399  | 0.00000 | 0.76405 | 0.00196 | 0.76601 |
| 74 h | 0.23164  | 0.00000 | 0.76671 | 0.00165 | 0.76836 |
| 75 h | 0.23098  | 0.00000 | 0.76731 | 0.00170 | 0.76902 |
| 76 h | -0.06955 | 0.00000 | 1.06840 | 0.00115 | 1.06955 |

-----  
\* Total \*      0.00000   93.95900   208.20372   0.83728   303.00000

**Table S19** Summary of Natural Population Analysis for complex **3**.

## Natural Population

| Natural ----- |          |          |         |         |          |
|---------------|----------|----------|---------|---------|----------|
| Atom No       | Charge   | Core     | Valence | Rydberg | Total    |
| -----         |          |          |         |         |          |
| 1 ni          | 0.96653  | 17.99557 | 9.00081 | 0.03709 | 27.03347 |
| 2 o           | -0.73758 | 1.99971  | 6.72507 | 0.01280 | 8.73758  |
| 3 n           | -0.55498 | 1.99921  | 5.53276 | 0.02301 | 7.55498  |
| 4 o           | -0.77697 | 1.99978  | 6.76646 | 0.01074 | 8.77697  |
| 5 h           | 0.46897  | 0.00000  | 0.52956 | 0.00146 | 0.53103  |
| 6 c           | 0.17126  | 1.99906  | 3.80511 | 0.02457 | 5.82874  |
| 7 h           | 0.20288  | 0.00000  | 0.79484 | 0.00228 | 0.79712  |
| 8 c           | -0.15889 | 1.99893  | 4.14342 | 0.01654 | 6.15889  |
| 9 h           | 0.23183  | 0.00000  | 0.76620 | 0.00198 | 0.76817  |
| 10 c          | -0.09765 | 1.99884  | 4.08308 | 0.01572 | 6.09765  |
| 11 c          | -0.41313 | 1.99915  | 4.39852 | 0.01545 | 6.41313  |
| 12 h          | 0.20349  | 0.00000  | 0.79346 | 0.00305 | 0.79651  |
| 13 h          | 0.21013  | 0.00000  | 0.78568 | 0.00419 | 0.78987  |
| 14 c          | -0.43448 | 1.99915  | 4.42154 | 0.01380 | 6.43448  |
| 15 h          | 0.20618  | 0.00000  | 0.78975 | 0.00407 | 0.79382  |
| 16 h          | 0.21557  | 0.00000  | 0.78205 | 0.00238 | 0.78443  |

|      |          |         |         |         |         |
|------|----------|---------|---------|---------|---------|
| 17 c | -0.02107 | 1.99915 | 4.00414 | 0.01777 | 6.02107 |
| 18 h | 0.17641  | 0.00000 | 0.82111 | 0.00248 | 0.82359 |
| 19 h | 0.17047  | 0.00000 | 0.82660 | 0.00292 | 0.82953 |
| 20 c | -0.22250 | 1.99894 | 4.20795 | 0.01561 | 6.22250 |
| 21 h | 0.22356  | 0.00000 | 0.77437 | 0.00207 | 0.77644 |
| 22 c | -0.41718 | 1.99912 | 4.40331 | 0.01474 | 6.41718 |
| 23 h | 0.20912  | 0.00000 | 0.78781 | 0.00307 | 0.79088 |
| 24 h | 0.21290  | 0.00000 | 0.78338 | 0.00373 | 0.78710 |
| 25 c | -0.21662 | 1.99882 | 4.20077 | 0.01704 | 6.21662 |
| 26 c | -0.19465 | 1.99911 | 4.17655 | 0.01899 | 6.19465 |
| 27 h | 0.20318  | 0.00000 | 0.79429 | 0.00253 | 0.79682 |
| 28 h | 0.22935  | 0.00000 | 0.76685 | 0.00380 | 0.77065 |
| 29 c | 0.43597  | 1.99877 | 3.53212 | 0.03314 | 5.56403 |
| 30 c | -0.40866 | 1.99914 | 4.39580 | 0.01371 | 6.40866 |
| 31 h | 0.20590  | 0.00000 | 0.79114 | 0.00296 | 0.79410 |
| 32 h | 0.20454  | 0.00000 | 0.79230 | 0.00315 | 0.79546 |
| 33 c | -0.02626 | 1.99888 | 4.01166 | 0.01572 | 6.02626 |
| 34 c | -0.26469 | 1.99890 | 4.24792 | 0.01788 | 6.26469 |
| 35 h | 0.23168  | 0.00000 | 0.76600 | 0.00232 | 0.76832 |
| 36 c | -0.18763 | 1.99893 | 4.17194 | 0.01676 | 6.18763 |
| 37 h | 0.22746  | 0.00000 | 0.77063 | 0.00191 | 0.77254 |

|      |          |         |         |         |         |
|------|----------|---------|---------|---------|---------|
| 38 c | -0.20739 | 1.99895 | 4.19196 | 0.01648 | 6.20739 |
| 39 h | 0.22874  | 0.00000 | 0.76955 | 0.00171 | 0.77126 |
| 40 c | -0.24169 | 1.99894 | 4.22615 | 0.01660 | 6.24169 |
| 41 h | 0.22903  | 0.00000 | 0.76930 | 0.00167 | 0.77097 |
| 42 o | -0.73761 | 1.99971 | 6.72513 | 0.01277 | 8.73761 |
| 43 n | -0.55468 | 1.99921 | 5.53247 | 0.02301 | 7.55468 |
| 44 o | -0.77711 | 1.99978 | 6.76660 | 0.01073 | 8.77711 |
| 45 h | 0.46904  | 0.00000 | 0.52950 | 0.00146 | 0.53096 |
| 46 c | 0.17140  | 1.99906 | 3.80499 | 0.02455 | 5.82860 |
| 47 h | 0.20298  | 0.00000 | 0.79474 | 0.00228 | 0.79702 |
| 48 c | -0.15872 | 1.99893 | 4.14324 | 0.01654 | 6.15872 |
| 49 h | 0.23180  | 0.00000 | 0.76623 | 0.00198 | 0.76820 |
| 50 c | -0.09764 | 1.99884 | 4.08308 | 0.01572 | 6.09764 |
| 51 c | -0.41313 | 1.99915 | 4.39853 | 0.01545 | 6.41313 |
| 52 h | 0.20354  | 0.00000 | 0.79341 | 0.00305 | 0.79646 |
| 53 h | 0.21006  | 0.00000 | 0.78575 | 0.00419 | 0.78994 |
| 54 c | -0.43449 | 1.99915 | 4.42155 | 0.01379 | 6.43449 |
| 55 h | 0.20618  | 0.00000 | 0.78975 | 0.00407 | 0.79382 |
| 56 h | 0.21561  | 0.00000 | 0.78201 | 0.00238 | 0.78439 |
| 57 c | -0.02108 | 1.99915 | 4.00417 | 0.01777 | 6.02108 |
| 58 h | 0.17650  | 0.00000 | 0.82102 | 0.00248 | 0.82350 |

|      |          |         |         |         |         |
|------|----------|---------|---------|---------|---------|
| 59 h | 0.17046  | 0.00000 | 0.82662 | 0.00293 | 0.82954 |
| 60 c | -0.22256 | 1.99894 | 4.20801 | 0.01561 | 6.22256 |
| 61 h | 0.22362  | 0.00000 | 0.77431 | 0.00206 | 0.77638 |
| 62 c | -0.41715 | 1.99912 | 4.40328 | 0.01474 | 6.41715 |
| 63 h | 0.20910  | 0.00000 | 0.78782 | 0.00308 | 0.79090 |
| 64 h | 0.21293  | 0.00000 | 0.78333 | 0.00374 | 0.78707 |
| 65 c | -0.21654 | 1.99882 | 4.20068 | 0.01704 | 6.21654 |
| 66 c | -0.19463 | 1.99911 | 4.17654 | 0.01898 | 6.19463 |
| 67 h | 0.20323  | 0.00000 | 0.79424 | 0.00253 | 0.79677 |
| 68 h | 0.22922  | 0.00000 | 0.76697 | 0.00381 | 0.77078 |
| 69 c | 0.43568  | 1.99877 | 3.53240 | 0.03315 | 5.56432 |
| 70 c | -0.40866 | 1.99914 | 4.39581 | 0.01372 | 6.40866 |
| 71 h | 0.20589  | 0.00000 | 0.79115 | 0.00296 | 0.79411 |
| 72 h | 0.20455  | 0.00000 | 0.79230 | 0.00316 | 0.79545 |
| 73 c | -0.02631 | 1.99888 | 4.01170 | 0.01572 | 6.02631 |
| 74 c | -0.26473 | 1.99890 | 4.24794 | 0.01789 | 6.26473 |
| 75 h | 0.23161  | 0.00000 | 0.76607 | 0.00232 | 0.76839 |
| 76 c | -0.18762 | 1.99893 | 4.17193 | 0.01676 | 6.18762 |
| 77 h | 0.22746  | 0.00000 | 0.77063 | 0.00191 | 0.77254 |
| 78 c | -0.20739 | 1.99895 | 4.19195 | 0.01649 | 6.20739 |
| 79 h | 0.22875  | 0.00000 | 0.76954 | 0.00171 | 0.77125 |

|      |          |         |         |         |         |
|------|----------|---------|---------|---------|---------|
| 80 c | -0.24172 | 1.99894 | 4.22618 | 0.01661 | 6.24172 |
| 81 h | 0.22903  | 0.00000 | 0.76930 | 0.00167 | 0.77097 |

-----

|           |         |          |           |         |           |
|-----------|---------|----------|-----------|---------|-----------|
| * Total * | 0.00000 | 97.95850 | 219.20283 | 0.83868 | 318.00000 |
|-----------|---------|----------|-----------|---------|-----------|



**Table S20** Summary of Natural Population Analysis for complex **3**-hydride.

## Natural Population

| Natural ----- |          |          |         |         |          |
|---------------|----------|----------|---------|---------|----------|
| Atom No       | Charge   | Core     | Valence | Rydberg | Total    |
| -----         |          |          |         |         |          |
| 1 ni          | 1.06583  | 17.99441 | 8.89065 | 0.04911 | 26.93417 |
| 2 o           | -0.77567 | 1.99973  | 6.76089 | 0.01505 | 8.77567  |
| 3 n           | -0.54932 | 1.99919  | 5.52623 | 0.02390 | 7.54932  |
| 4 o           | -0.77783 | 1.99978  | 6.76734 | 0.01072 | 8.77783  |
| 5 c           | 0.17777  | 1.99905  | 3.79840 | 0.02478 | 5.82223  |
| 6 c           | -0.15882 | 1.99892  | 4.14335 | 0.01655 | 6.15882  |
| 7 c           | -0.09879 | 1.99884  | 4.08418 | 0.01577 | 6.09879  |
| 8 c           | -0.41324 | 1.99915  | 4.39870 | 0.01539 | 6.41324  |
| 9 c           | -0.43504 | 1.99915  | 4.42204 | 0.01386 | 6.43504  |
| 10 c          | -0.02143 | 1.99915  | 4.00453 | 0.01775 | 6.02143  |
| 11 c          | -0.22392 | 1.99894  | 4.20948 | 0.01550 | 6.22392  |
| 12 c          | -0.41876 | 1.99912  | 4.40528 | 0.01436 | 6.41876  |
| 13 c          | -0.22085 | 1.99883  | 4.20495 | 0.01707 | 6.22085  |
| 14 c          | -0.19547 | 1.99911  | 4.17700 | 0.01937 | 6.19547  |
| 15 c          | 0.45223  | 1.99882  | 3.51347 | 0.03548 | 5.54777  |
| 16 c          | -0.40895 | 1.99915  | 4.39593 | 0.01387 | 6.40895  |

|      |          |         |         |         |         |
|------|----------|---------|---------|---------|---------|
| 17 c | -0.02567 | 1.99889 | 4.01100 | 0.01579 | 6.02567 |
| 18 c | -0.26945 | 1.99890 | 4.25242 | 0.01813 | 6.26945 |
| 19 c | -0.18805 | 1.99893 | 4.17239 | 0.01674 | 6.18805 |
| 20 c | -0.20735 | 1.99895 | 4.19185 | 0.01654 | 6.20735 |
| 21 c | -0.24201 | 1.99894 | 4.22639 | 0.01668 | 6.24201 |
| 22 o | -0.79300 | 1.99973 | 6.77784 | 0.01543 | 8.79300 |
| 23 n | -0.55487 | 1.99921 | 5.53128 | 0.02439 | 7.55487 |
| 24 o | -0.77715 | 1.99978 | 6.76665 | 0.01072 | 8.77715 |
| 25 c | 0.17440  | 1.99905 | 3.80160 | 0.02495 | 5.82560 |
| 26 c | -0.15689 | 1.99893 | 4.14144 | 0.01652 | 6.15689 |
| 27 c | -0.09679 | 1.99884 | 4.08223 | 0.01572 | 6.09679 |
| 28 c | -0.41272 | 1.99915 | 4.39818 | 0.01538 | 6.41272 |
| 29 c | -0.43436 | 1.99915 | 4.42137 | 0.01385 | 6.43436 |
| 30 c | -0.02114 | 1.99915 | 4.00422 | 0.01777 | 6.02114 |
| 31 c | -0.22202 | 1.99894 | 4.20759 | 0.01549 | 6.22202 |
| 32 c | -0.41764 | 1.99912 | 4.40469 | 0.01383 | 6.41764 |
| 33 c | -0.21338 | 1.99883 | 4.19765 | 0.01691 | 6.21338 |
| 34 c | -0.19562 | 1.99912 | 4.17705 | 0.01946 | 6.19562 |
| 35 c | 0.45129  | 1.99881 | 3.51465 | 0.03525 | 5.54871 |
| 36 c | -0.41027 | 1.99915 | 4.39722 | 0.01390 | 6.41027 |
| 37 c | -0.02588 | 1.99888 | 4.01125 | 0.01575 | 6.02588 |

|      |          |         |         |         |         |
|------|----------|---------|---------|---------|---------|
| 38 c | -0.26730 | 1.99890 | 4.25042 | 0.01798 | 6.26730 |
| 39 c | -0.18784 | 1.99893 | 4.17217 | 0.01674 | 6.18784 |
| 40 c | -0.20674 | 1.99895 | 4.19128 | 0.01651 | 6.20674 |
| 41 c | -0.24001 | 1.99894 | 4.22445 | 0.01663 | 6.24001 |
| 42 h | 0.46952  | 0.00000 | 0.52903 | 0.00145 | 0.53048 |
| 43 h | 0.20255  | 0.00000 | 0.79511 | 0.00234 | 0.79745 |
| 44 h | 0.23151  | 0.00000 | 0.76647 | 0.00202 | 0.76849 |
| 45 h | 0.20414  | 0.00000 | 0.79281 | 0.00304 | 0.79586 |
| 46 h | 0.20935  | 0.00000 | 0.78642 | 0.00423 | 0.79065 |
| 47 h | 0.20633  | 0.00000 | 0.78959 | 0.00408 | 0.79367 |
| 48 h | 0.21610  | 0.00000 | 0.78153 | 0.00237 | 0.78390 |
| 49 h | 0.17675  | 0.00000 | 0.82078 | 0.00247 | 0.82325 |
| 50 h | 0.17106  | 0.00000 | 0.82602 | 0.00291 | 0.82894 |
| 51 h | 0.22291  | 0.00000 | 0.77499 | 0.00211 | 0.77709 |
| 52 h | 0.21118  | 0.00000 | 0.78577 | 0.00305 | 0.78882 |
| 53 h | 0.21394  | 0.00000 | 0.78284 | 0.00322 | 0.78606 |
| 54 h | 0.20740  | 0.00000 | 0.79007 | 0.00253 | 0.79260 |
| 55 h | 0.23018  | 0.00000 | 0.76582 | 0.00400 | 0.76982 |
| 56 h | 0.20615  | 0.00000 | 0.79089 | 0.00296 | 0.79385 |
| 57 h | 0.20663  | 0.00000 | 0.79023 | 0.00314 | 0.79337 |
| 58 h | 0.22820  | 0.00000 | 0.76913 | 0.00266 | 0.77180 |

|      |         |         |         |         |         |
|------|---------|---------|---------|---------|---------|
| 59 h | 0.22735 | 0.00000 | 0.77073 | 0.00192 | 0.77265 |
| 60 h | 0.22849 | 0.00000 | 0.76979 | 0.00172 | 0.77151 |
| 61 h | 0.22878 | 0.00000 | 0.76956 | 0.00166 | 0.77122 |
| 62 h | 0.46913 | 0.00000 | 0.52942 | 0.00146 | 0.53087 |
| 63 h | 0.20329 | 0.00000 | 0.79430 | 0.00241 | 0.79671 |
| 64 h | 0.23176 | 0.00000 | 0.76622 | 0.00202 | 0.76824 |
| 65 h | 0.20370 | 0.00000 | 0.79326 | 0.00304 | 0.79630 |
| 66 h | 0.20932 | 0.00000 | 0.78660 | 0.00408 | 0.79068 |
| 67 h | 0.20600 | 0.00000 | 0.78994 | 0.00406 | 0.79400 |
| 68 h | 0.21566 | 0.00000 | 0.78196 | 0.00237 | 0.78434 |
| 69 h | 0.17663 | 0.00000 | 0.82090 | 0.00247 | 0.82337 |
| 70 h | 0.17049 | 0.00000 | 0.82659 | 0.00292 | 0.82951 |
| 71 h | 0.22299 | 0.00000 | 0.77488 | 0.00213 | 0.77701 |
| 72 h | 0.20625 | 0.00000 | 0.79110 | 0.00265 | 0.79375 |
| 73 h | 0.22333 | 0.00000 | 0.77241 | 0.00426 | 0.77667 |
| 74 h | 0.20842 | 0.00000 | 0.78898 | 0.00261 | 0.79158 |
| 75 h | 0.22580 | 0.00000 | 0.77144 | 0.00275 | 0.77420 |
| 76 h | 0.20519 | 0.00000 | 0.79180 | 0.00301 | 0.79481 |
| 77 h | 0.20478 | 0.00000 | 0.79187 | 0.00335 | 0.79522 |
| 78 h | 0.23233 | 0.00000 | 0.76509 | 0.00258 | 0.76767 |
| 79 h | 0.22779 | 0.00000 | 0.77030 | 0.00191 | 0.77221 |

|      |          |         |         |         |         |
|------|----------|---------|---------|---------|---------|
| 80 h | 0.22891  | 0.00000 | 0.76938 | 0.00171 | 0.77109 |
| 81 h | 0.22928  | 0.00000 | 0.76905 | 0.00166 | 0.77072 |
| 82 h | -0.05686 | 0.00000 | 1.05434 | 0.00252 | 1.05686 |

-----

\* Total \*    -0.00000    97.95747    220.17710    0.86543    319.00000

**Table S21.** Dipole moment of complexes (**1**, **2** and **3**)

|                  |                                                                                                                                             |
|------------------|---------------------------------------------------------------------------------------------------------------------------------------------|
| Complex <b>1</b> | \$dipole from dscf<br>x -0.00594651188212    y    0.00130130527805    z    -0.01100192940339<br>a.u.<br><br>  dipole   = 0.0319592898 debye |
| Complex <b>2</b> | \$dipole from dscf<br>x -0.00445480443091    y    0.00240391006082    z    0.00209883938714<br>a.u.<br><br>  dipole   = 0.0139285960 debye  |
| Complex <b>3</b> | \$dipole from dscf<br>x -0.00320946676061    y    0.00006161043984    z    0.00221978258378<br>a.u.<br><br>  dipole   = 0.0099200225 debye  |
